# Supplementary material for: Comparative Analysis of the Transcriptome, Proteome, and miRNA Profile of Kupffer Cells and Monocytes
Source: PubMed Central journal article supplement (PMC7766432; doi:10.3390/biomedicines8120627), 2020-12-18
Supplement: biomedicines-08-00627-s001.pdf [file biomedicines-08-00627-s001.pdf]

# Supplementary Materials

## COMPARATIVE ANALYSIS OF THE TRANSCRIPTOME, PROTEOME AND miRNA PROFILE OF KUPFFER CELLS AND MONOCYTES

Andrey Elchaninov<sup>1,3\*</sup>, Anastasiya Lokhonina<sup>1,3</sup>, Maria Nikitina<sup>2</sup>, Polina Vishnyakova<sup>1,3</sup>, Andrey Makarov<sup>1</sup>, Irina Arutyunyan<sup>1</sup>, Anastasiya Poltavets<sup>1</sup>, Evgeniya Kananykhina<sup>2</sup>, Sergey Kovalchuk<sup>4</sup>, Evgeny Karpulevich<sup>5,6</sup>, Galina Bolshakova<sup>2</sup>, Gennady Sukhikh<sup>1</sup>, Timur Fatkhudinov<sup>2,3</sup>

<sup>1</sup> Laboratory of Regenerative Medicine, National Medical Research Center for Obstetrics, Gynecology and Perinatology Named after Academician V.I. Kulakov of Ministry of Healthcare of Russian Federation, Moscow, Russia

<sup>2</sup> Laboratory of Growth and Development, Scientific Research Institute of Human Morphology, Moscow, Russia

<sup>3</sup> Histology Department, Medical Institute, Peoples' Friendship University of Russia, Moscow, Russia

<sup>4</sup> Laboratory of Bioinformatic methods for Combinatorial Chemistry and Biology, Shemyakin-Ovchinnikov Institute of Bioorganic Chemistry of the Russian Academy of Sciences, Moscow, Russia

<sup>5</sup> Information Systems Department, Ivannikov Institute for System Programming of the Russian Academy of Sciences, Moscow, Russia

<sup>6</sup> Genome Engineering Laboratory, Moscow Institute of Physics and Technology, Dolgoprudny, Moscow Region, Russia

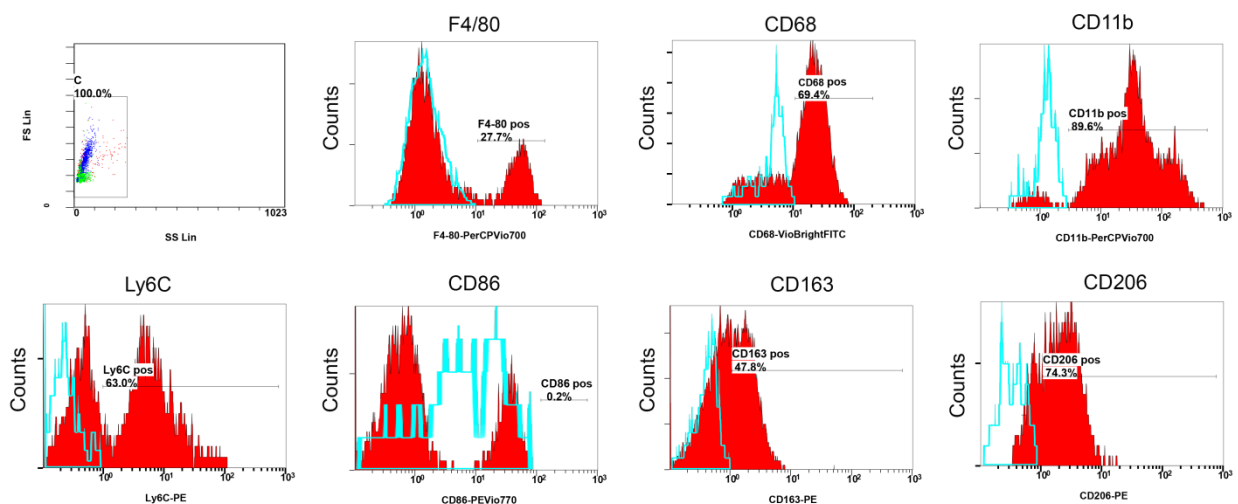

Figure S1. Flow cytometry analysis of unsorted blood sample. Representative forward, side scattering and histogram are shown. The proportions of negative cells were determined in relation to the isotype controls. The percentages of positive cells are indicated. The blue curve corresponds to the isotype control.

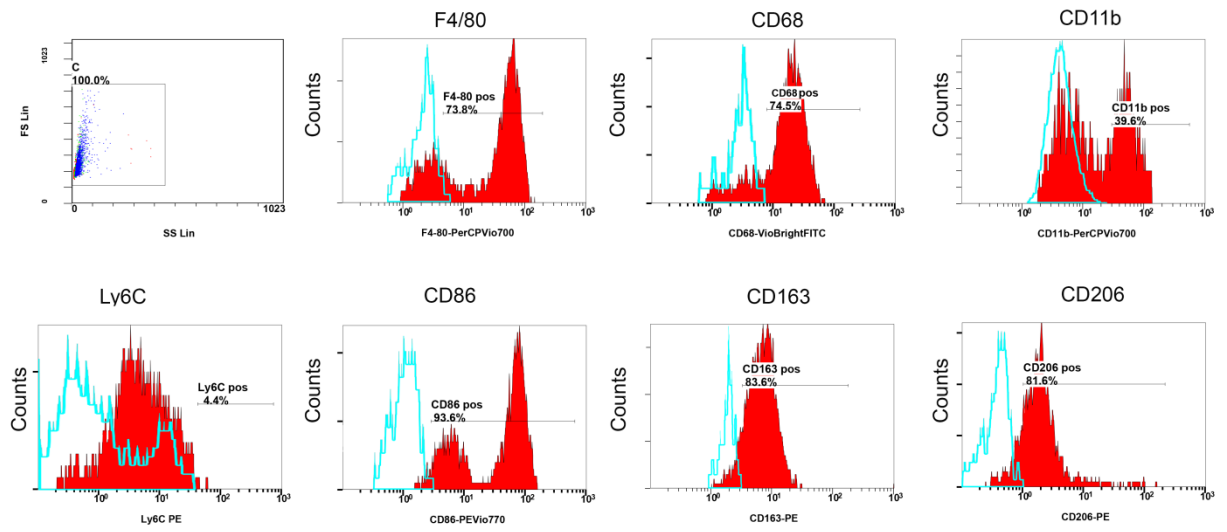

Figure S2. Flow cytometry analysis of unsorted liver stromal cells. Representative forward, side scattering and histogram are shown. The proportions of negative cells were determined in relation to the isotype controls. The percentages of positive cells are indicated. The blue curve corresponds to the isotype control.

# microRNA profile

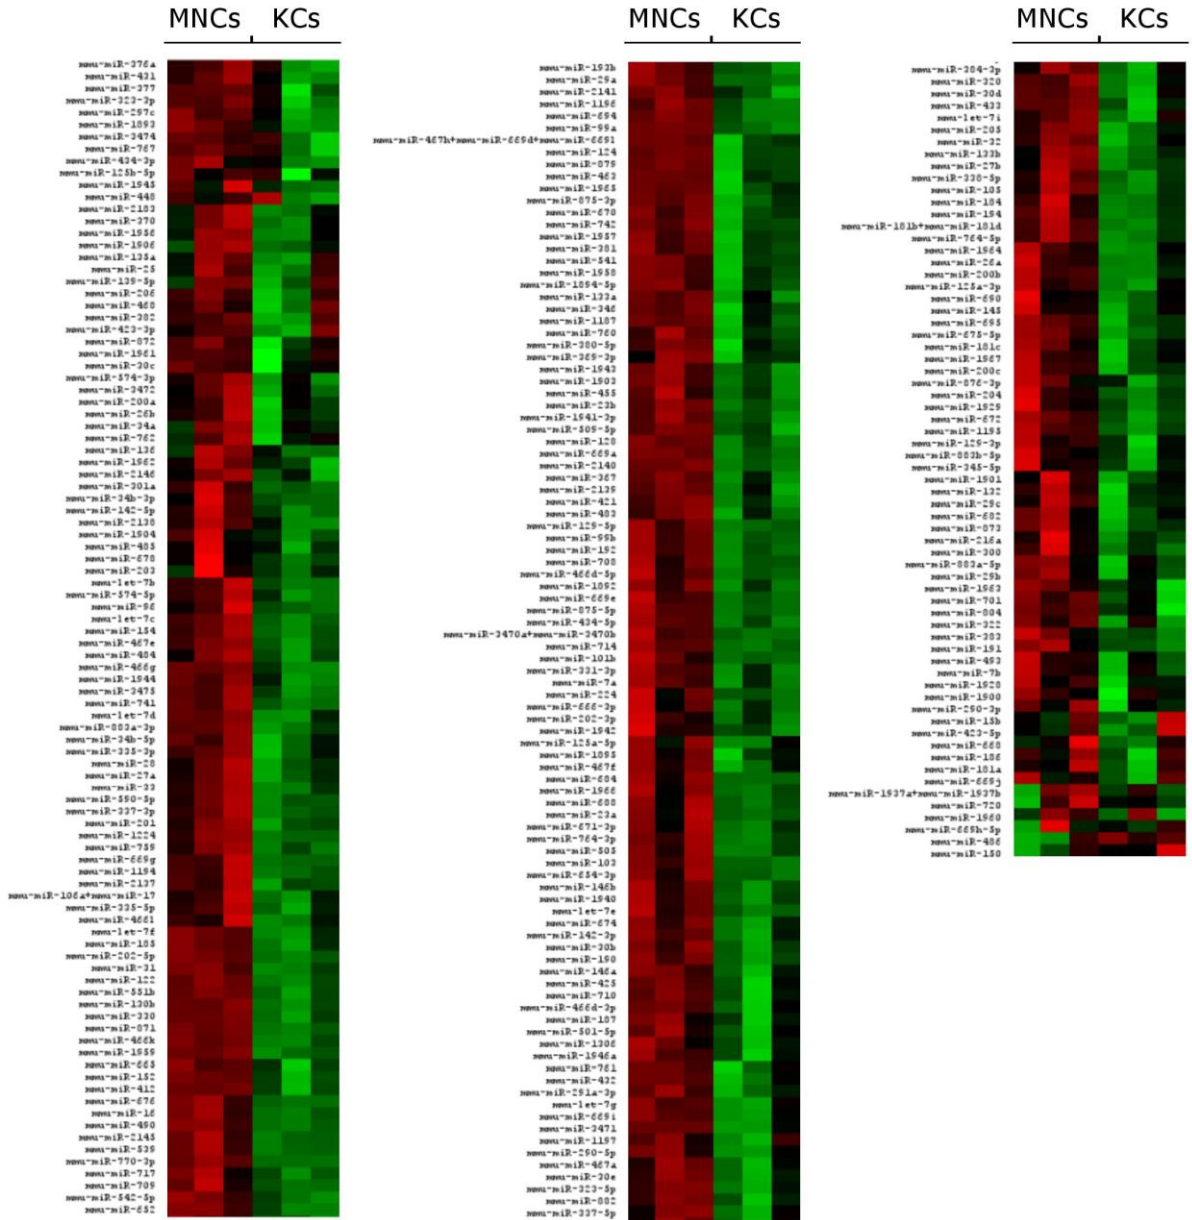

Figure S3. MiRNAs expression analysis in monocytes and Kupffer cells. Full-length of heatmaps are presented.

Molecular function

Monocytes proteome

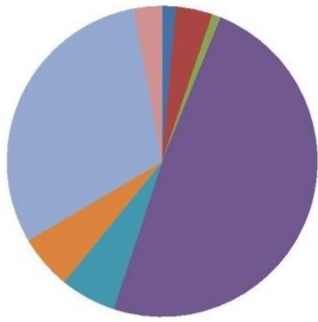

- translation regulator activity (GO:0045182)
- transcription regulator activity (GO:0140110)
- molecular transducer activity (GO:0060089)
- binding (GO:0005488)
- structural molecule activity (GO:0005198)
- molecular function regulator (GO:0098772)
- catalytic activity (GO:0003824)
- transporter activity (GO:0005215)

Kupffer cells proteome

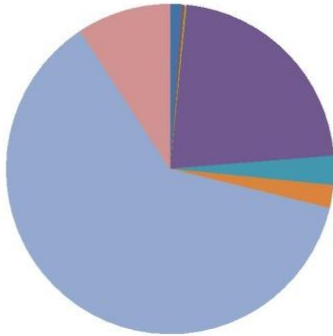

- translation regulator activity (GO:0045182)
- transcription regulator activity (GO:0140110)
- molecular transducer activity (GO:0060089)
- binding (GO:0005488)
- structural molecule activity (GO:0005198)
- molecular function regulator (GO:0098772)
- catalytic activity (GO:0003824)
- transporter activity (GO:0005215)

Biological processes

Monocytes proteome

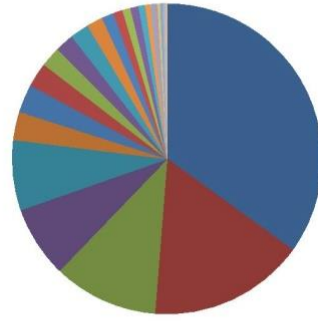

- cellular metabolic process (GO:0044237)
- cellular component organization (GO:0016043)
- cellular response to stimulus (GO:0051716)
- cell communication (GO:0007154)
- signal transduction (GO:0007165)
- cell cycle (GO:0007049)
- cell cycle process (GO:0022402)
- cellular developmental process (GO:0048869)
- actin filament-based process (GO:0030029)
- microtubule-based process (GO:0007017)
- movement of cell or subcellular component (GO:0006928)
- cell death (GO:0008219)
- chromosome segregation (GO:0007059)
- protein folding (GO:0006457)
- export from cell (GO:0140352)
- cellular homeostasis (GO:0019725)
- cell activation (GO:0001775)
- cell division (GO:0051301)
- process utilizing autophagic mechanism (GO:0061919)
- exocytic process (GO:0140029)

Kupffer cells proteome

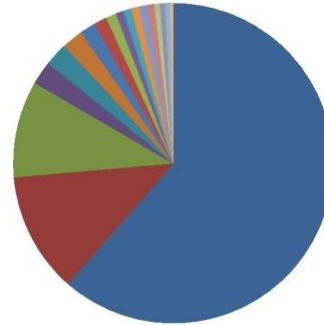

- cellular metabolic process (GO:0044237)
- cellular component organization (GO:0016043)
- cellular response to stimulus (GO:0051716)
- cell communication (GO:0007154)
- cellular homeostasis (GO:0019725)
- signal transduction (GO:0007165)
- cellular developmental process (GO:0048869)
- protein folding (GO:0006457)
- cell activation (GO:0001775)
- export from cell (GO:0140352)
- microtubule-based process (GO:0007017)
- actin filament-based process (GO:0030029)
- movement of cell or subcellular component (GO:0006928)
- cell death (GO:0008219)
- cell cycle (GO:0007049)
- establishment or maintenance of cell polarity (GO:0007163)
- cell cycle process (GO:0022402)
- vesicle targeting (GO:0006903)

Figure S4: Pie charts of the proteome from monocytes and Kupffer cells are listed according to molecular function and biological processes categories according to PANTHER (<http://pantherdb.org/>). Sectors of the category indicate proteins that are significantly up-regulated in Kupffer cells vs monocytes and vice versa.

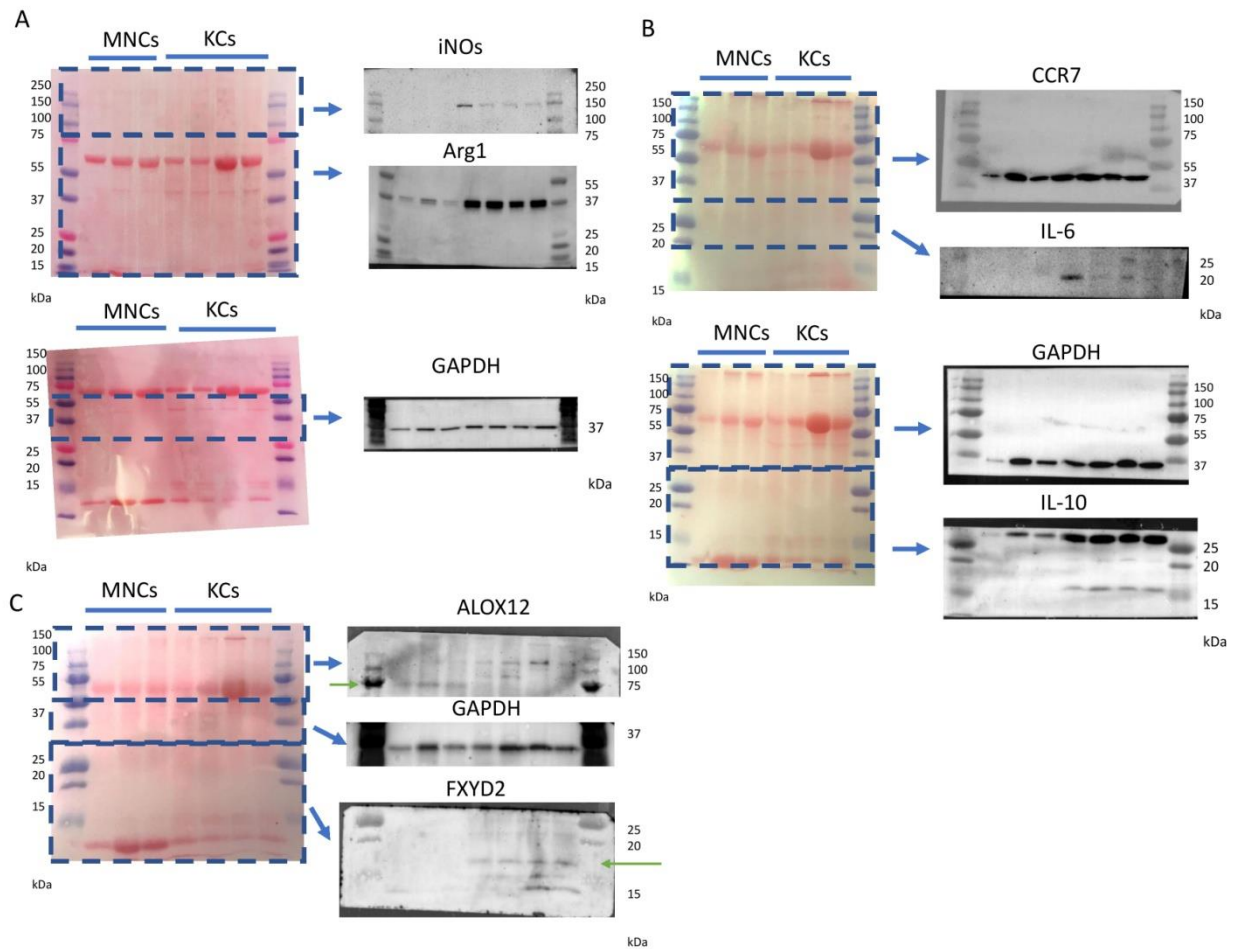

Figure S5. Full-size membrane after blotting of polyacrylamide gel (A, B, C). Schemes of membrane Ponceau S staining and cutting of KC (Kupffer cells) and MNCs (monocytes samples) samples are shown. After visualization of the proteins with Ponceau S membranes were cut as indicated with a dotted line and stained with mentioned antibodies. On A and B – gels were run in parallel due to the similar molecular weight of Arg1, CCR7 and GAPDH. Green arrow indicates the detected band of interest.

ALOX2

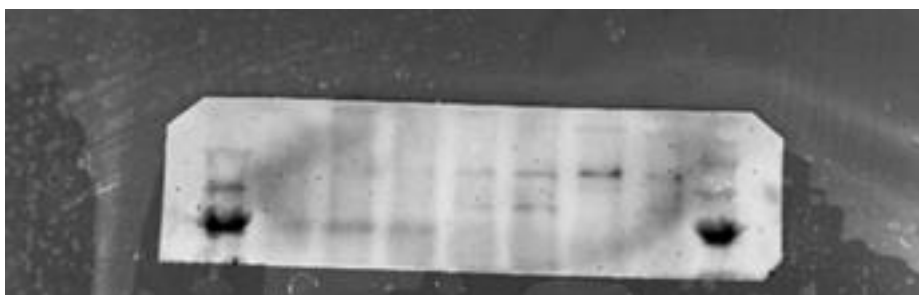

Arginase1

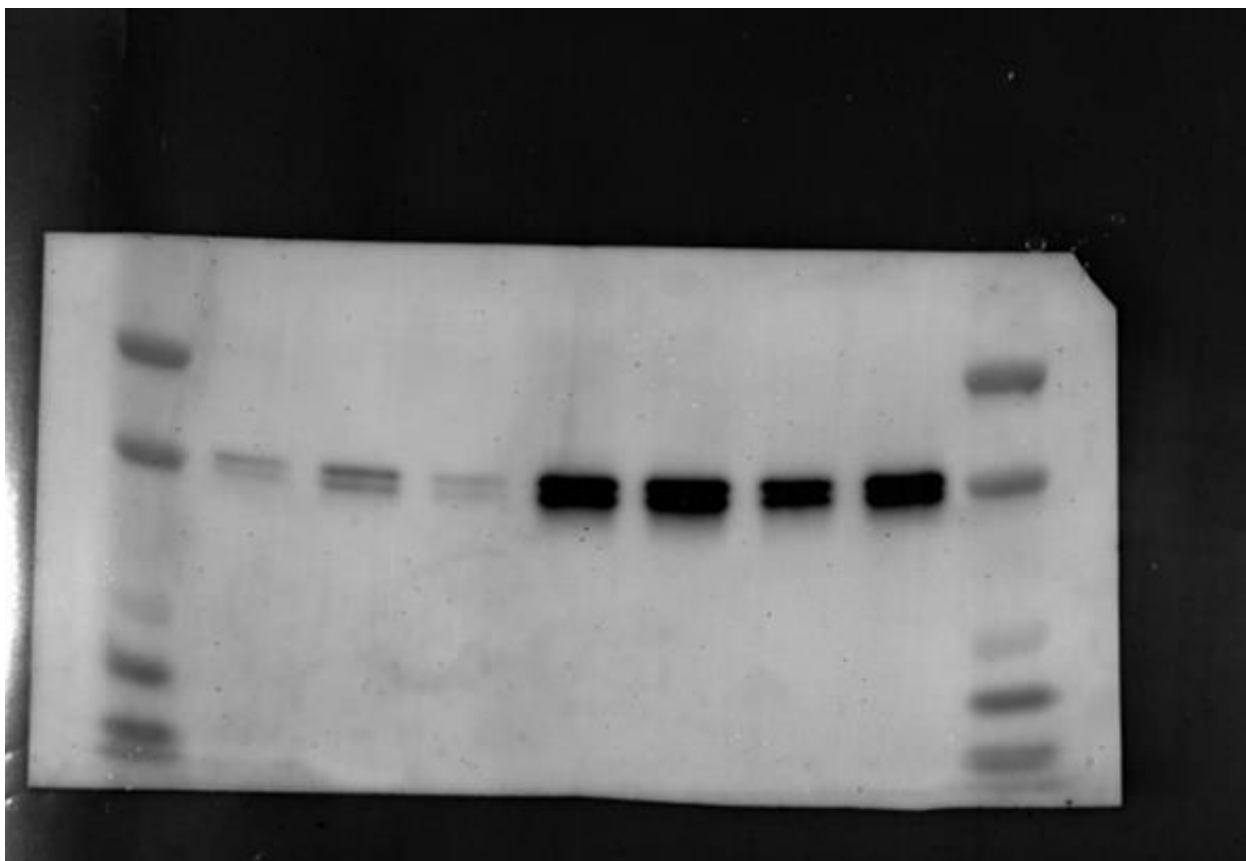

CCR7

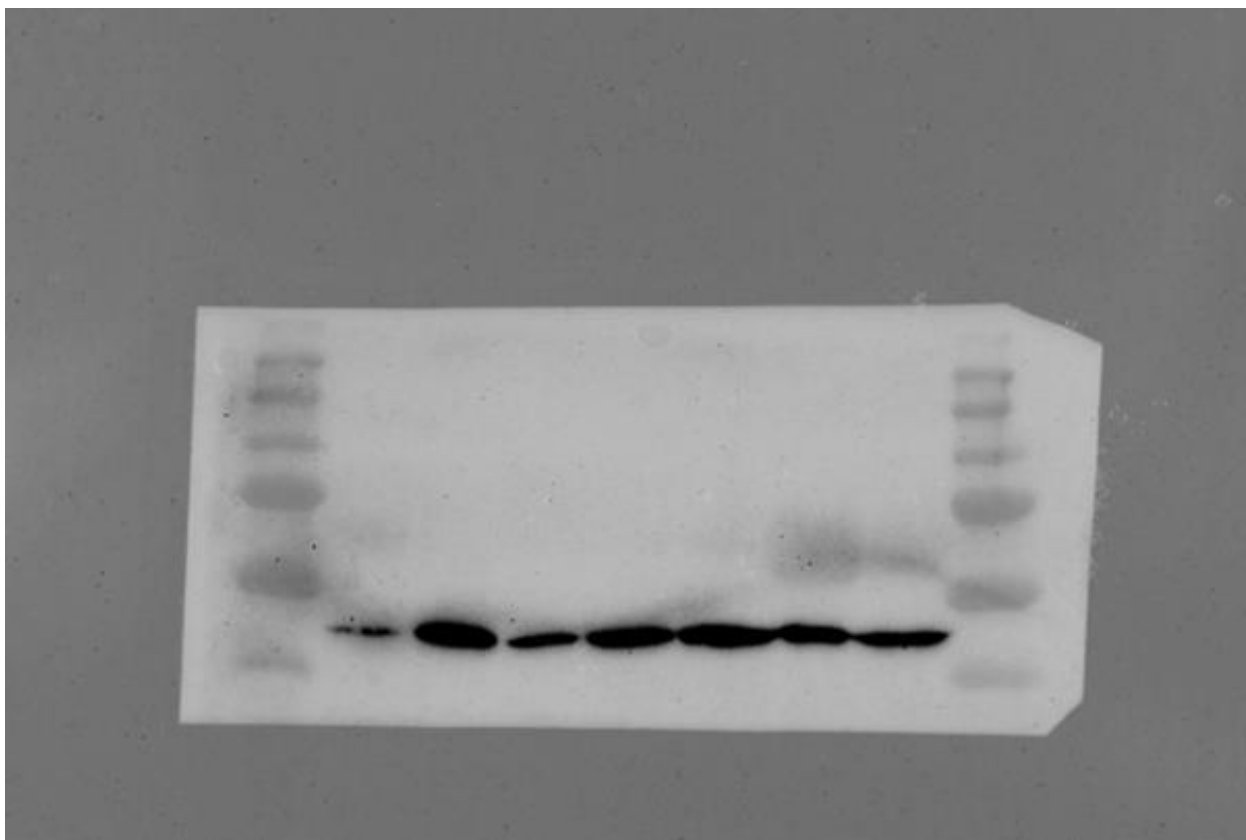

FXD2

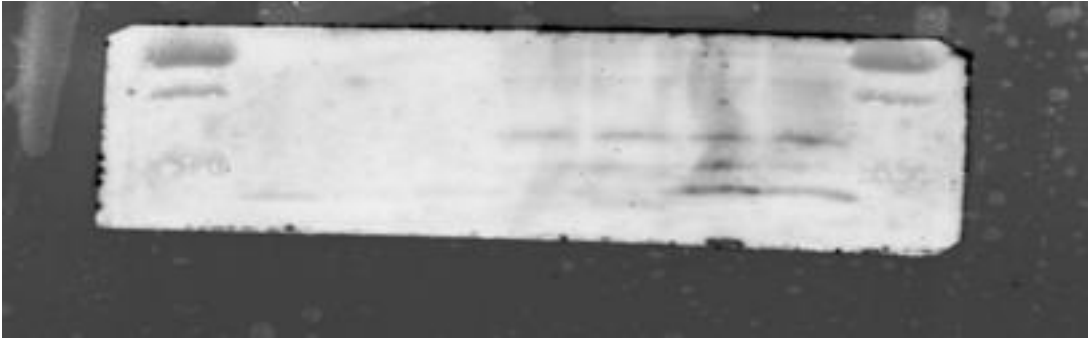

IL6

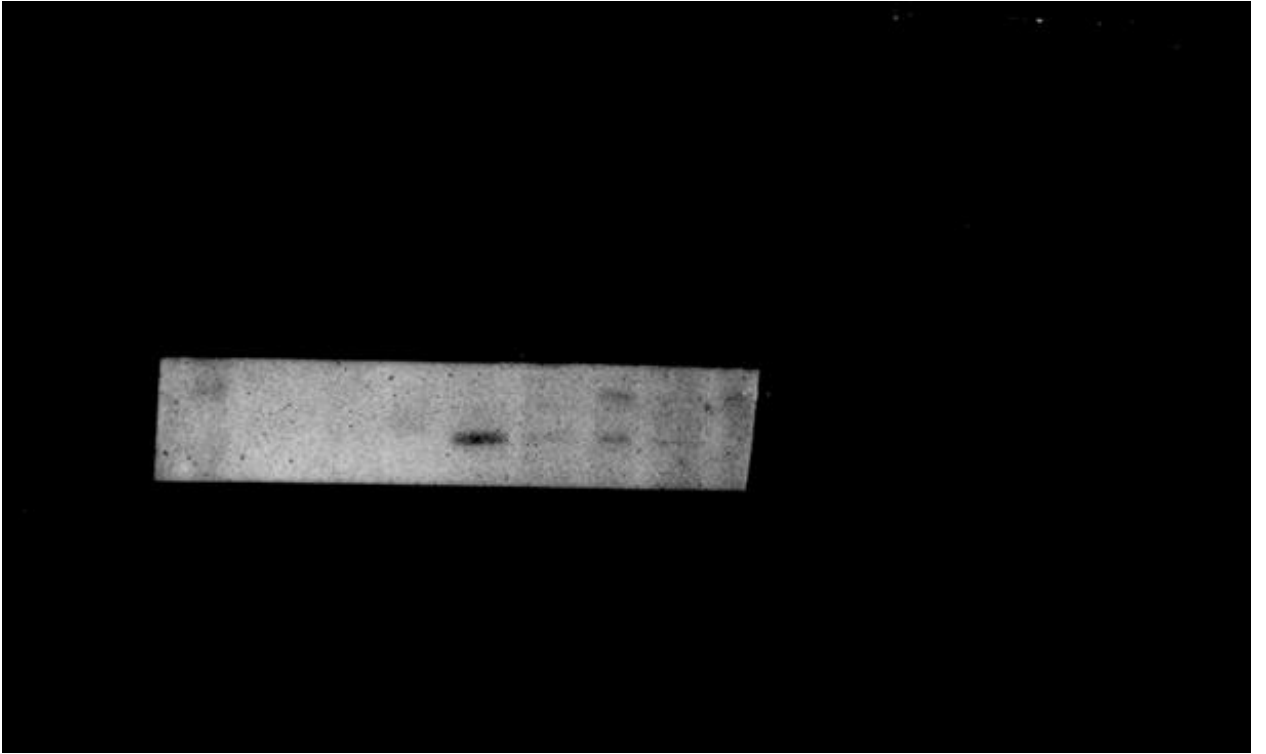

IL10

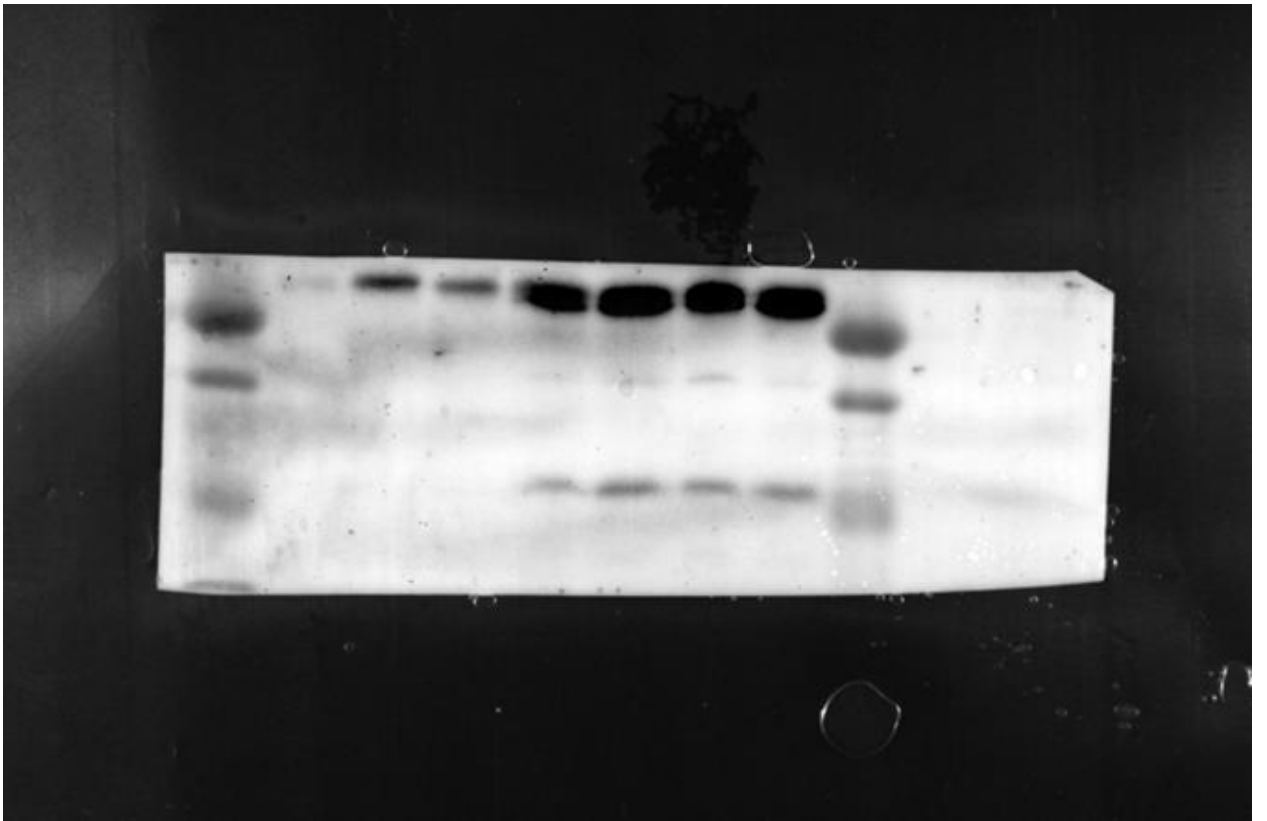

NOS2

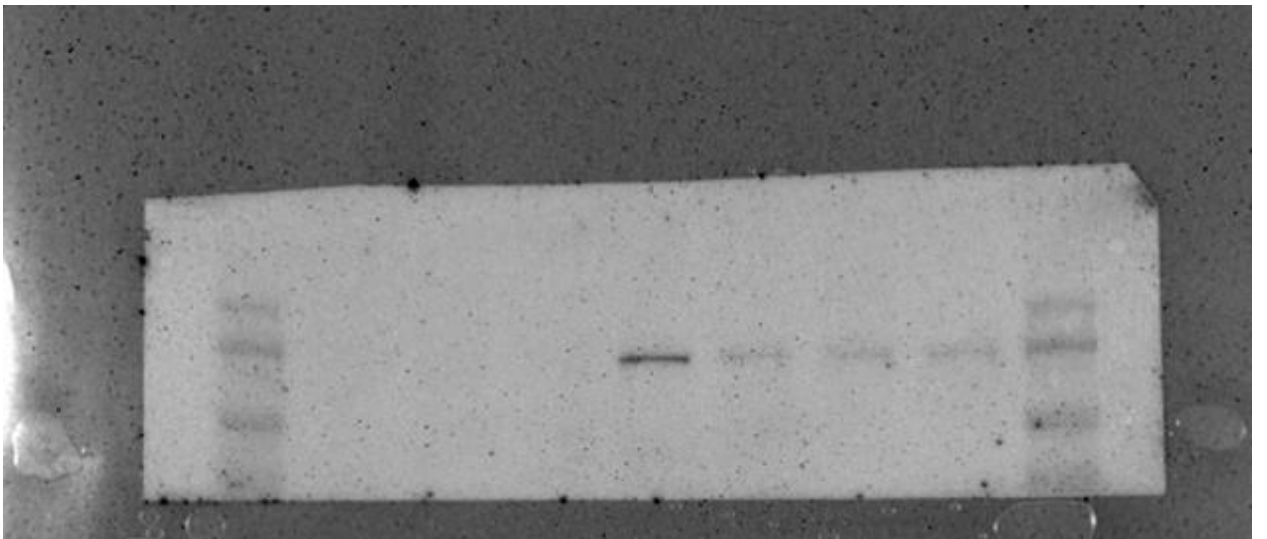



GAPDH

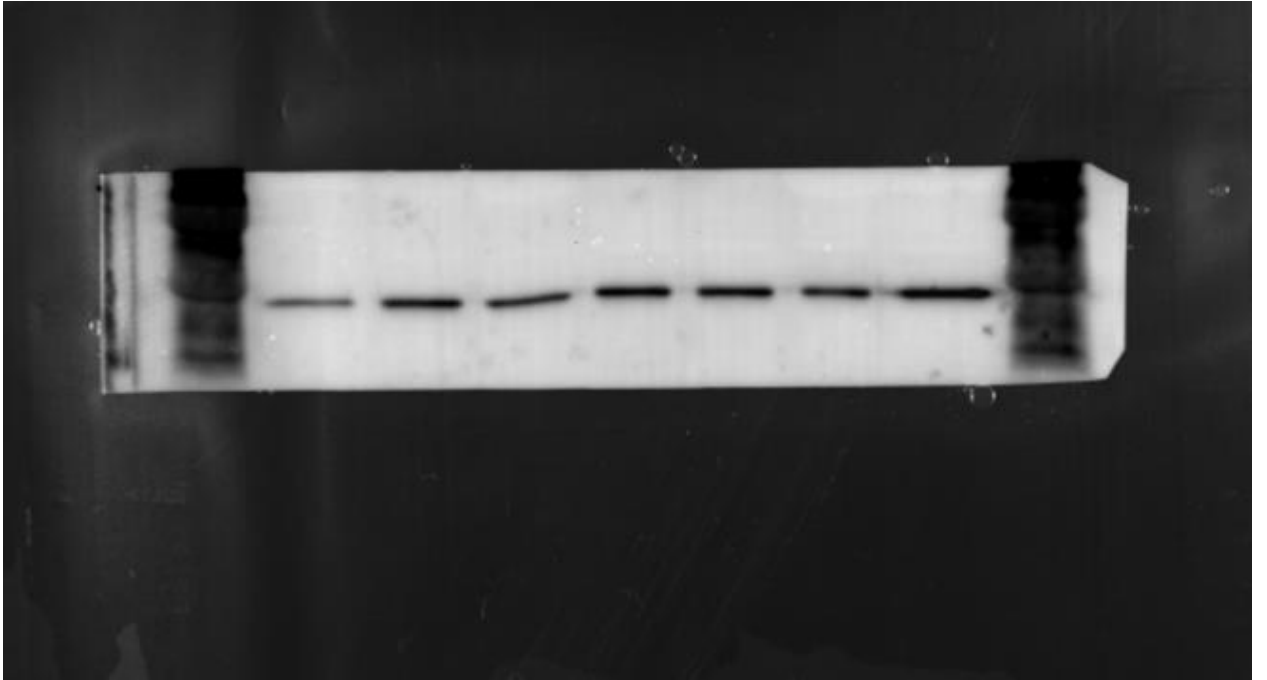

GAPDH

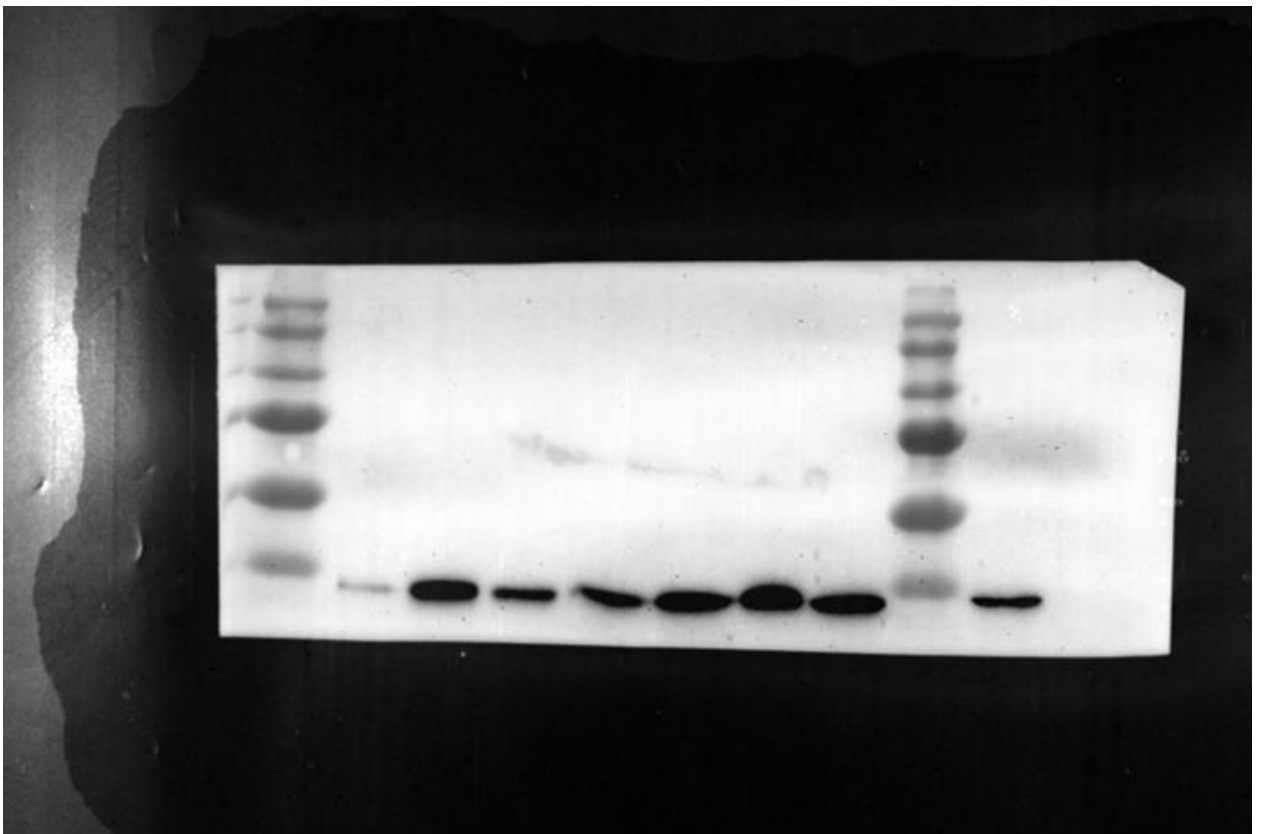

GAPDH

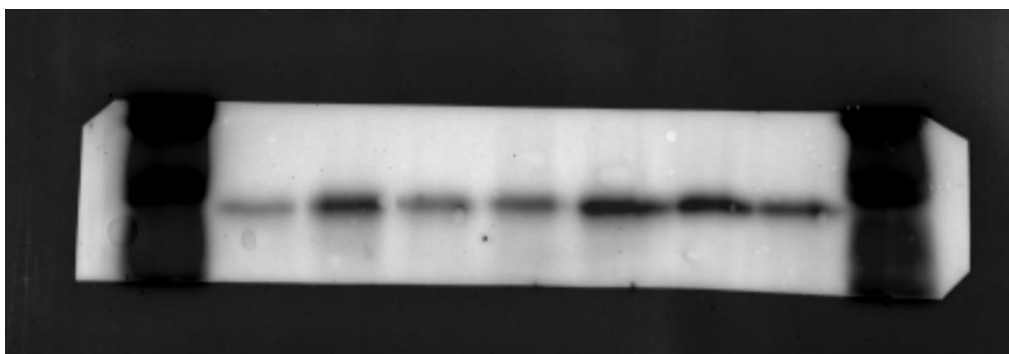

Figure S6. Uncropped membrane after blotting of polyacrylamide gel.

Table S1. List of proteins up-regulated in Kupffer cells vs monocytes and belonged to PC00262 group of proteins (metabolite interconversion enzyme) according to PANTHER (<http://pantherdb.org/>).

| Gene ID                                | Mapped IDs | Gene Name, Gene symbol, ortholog                                                       | PANTHER Family/Subfamily                                                                  | PANTHER Protein Class                                                               | Species      |
|----------------------------------------|------------|----------------------------------------------------------------------------------------|-------------------------------------------------------------------------------------------|-------------------------------------------------------------------------------------|--------------|
| MOUSE MGI=MGI=1929242 UniProtKB=Q9JHI5 | IVD        | Isovaleryl-CoA dehydrogenase, mitochondrial;Ivd;ortholog                               | ISOVALERYL-COA DEHYDROGENASE, MITOCHONDRIAL-RELATED (PTHR43884:SF12)                      | dehydrogenase(PC00092)                                                              | Mus musculus |
| MOUSE MGI=MGI=1306775 UniProtKB=Q9Z219 | SUCB1      | Succinate--CoA ligase [ADP-forming] subunit beta, mitochondrial;Sucla2;ortholog        | SUCCINATE--COA LIGASE [ADP-FORMING] SUBUNIT BETA, MITOCHONDRIAL (PTHR11815:SF10)          | ligase(PC00142)                                                                     | Mus musculus |
| MOUSE MGI=MGI=1914195 UniProtKB=Q8K2B3 | SDHA       | Succinate dehydrogenase [ubiquinone] flavoprotein subunit, mitochondrial;Sdha;ortholog | SUCCINATE DEHYDROGENASE [UBIQUINONE] FLAVOPROTEIN SUBUNIT, MITOCHONDRIAL (PTHR11632:SF51) | dehydrogenase(PC00092)                                                              | Mus musculus |
| MOUSE MGI=MGI=88035 UniProtKB=O54754   | AOXA       | Aldehyde oxidase 1;Aox1;ortholog                                                       | ALDEHYDE OXIDASE (PTHR11908:SF86)                                                         | oxidoreductase(PC00176)                                                             | Mus musculus |
| MOUSE MGI=MGI=97394 UniProtKB=P29758   | OAT        | Ornithine aminotransferase, mitochondrial;Oat;ortholog                                 | ORNITHINE AMINOTRANSFERASE, MITOCHONDRIAL (PTHR11986:SF18)                                | transaminase(PC00216)                                                               | Mus musculus |
| MOUSE MGI=MGI=97770 UniProtKB=Q9WU79   | PROD       | Proline dehydrogenase 1, mitochondrial;Prodh;ortholog                                  | PROLINE DEHYDROGENASE 1, MITOCHONDRIAL (PTHR13914:SF22)                                   | oxidase(PC00175)                                                                    | Mus musculus |
| MOUSE MGI=MGI=2158650 UniProtKB=Q91VA7 | Q91VA7     | Isocitrate dehydrogenase [NAD] subunit, mitochondrial;dh3b;ortholog                    | ISOCITRATE DEHYDROGENASE [NAD] SUBUNIT BETA, MITOCHONDRIAL (PTHR11835:SF42)               | dehydrogenase(PC00092)                                                              | Mus musculus |
| MOUSE MGI=MGI=96916 UniProtKB=Q8BW75   | AOFB       | Amine oxidase [flavin-containing] B;Maob;ortholog                                      | AMINE OXIDASE [FLAVIN-CONTAINING] B (PTHR43563:SF5)                                       | oxidase(PC00175)                                                                    | Mus musculus |
| MOUSE MGI=MGI=96078 UniProtKB=O09173   | HGD        | Homogentisate 1,2-dioxygenase;Hgd;ortholog                                             | HOMOGENTISATE 1,2-DIOXYGENASE (PTHR11056:SF0)                                             | oxygenase(PC00177)                                                                  | Mus musculus |
| MOUSE MGI=MGI=1917592 UniProtKB=Q8BWM0 | PGES2      | Prostaglandin E synthase 2;Ptgs2;ortholog                                              | PROSTAGLANDIN E SYNTHASE 2 (PTHR12782:SF5)                                                | reductase(PC00198)                                                                  | Mus musculus |
| MOUSE MGI=MGI=97797 UniProtKB=P22437   | COX1       | Prostaglandin G/H synthase 1;Ptgs1;ortholog                                            | PROSTAGLANDIN G/H SYNTHASE 1 (PTHR11903:SF6)                                              | oxygenase(PC00177)                                                                  | Mus musculus |
| MOUSE MGI=MGI=2142985 UniProtKB=Q3TNA1 | XYLB       | Xylulose kinase;Xylb;ortholog                                                          | XYLULOSE KINASE (PTHR10196:SF57)                                                          | carbohydrate kinase(PC00065)                                                        | Mus musculus |
| MOUSE MGI=MGI=2136976 UniProtKB=Q91WM2 | HDHD5      | Halooacid dehalogenase-like hydrolase domain-containing 5;Hdhd5;ortholog               | HALOACID DEHALOGENASE-LIKE HYDROLASE DOMAIN-CONTAINING 5 (PTHR14269:SF17)                 | transferase(PC00220)                                                                | Mus musculus |
| MOUSE MGI=MGI=1330818 UniProtKB=Q8BND5 | SOX        | Sulfhydryl oxidase 1;Qsox1;ortholog                                                    | SULFHYDRYL OXIDASE 1 (PTHR22897:SF6)                                                      | oxidase(PC00175)                                                                    | Mus musculus |
| MOUSE MGI=MGI=1926952 UniProtKB=P56395 | CYB5       | Cytochrome b5;Cyb5a;ortholog                                                           | CYTOCHROME B5 (PTHR19359:SF105)                                                           | oxidoreductase(PC00176)                                                             | Mus musculus |
| MOUSE MGI=MGI=106362 UniProtKB=Q5SUC9  | SCO1       | Protein SCO1 homolog, mitochondrial;Sco1;ortholog                                      | PROTEIN SCO1 HOMOLOG, MITOCHONDRIAL (PTHR12151:SF4)                                       | oxidase(PC00175)                                                                    | Mus musculus |
| MOUSE MGI=MGI=108186 UniProtKB=Q9DBF1  | AL7A1      | Alpha-aminoadipic semialdehyde dehydrogenase;Aldh7a1;ortholog                          | ALPHA-AMINOADIPIC SEMIALDEHYDE DEHYDROGENASE (PTHR43521:SF1)                              | dehydrogenase(PC00092)                                                              | Mus musculus |
| MOUSE MGI=MGI=95485 UniProtKB=P19096   | FAS        | Fatty acid synthase;Fasn;ortholog                                                      | FATTY ACID SYNTHASE (PTHR43775:SF7)                                                       | acyltransferase(PC00042);ligase(PC00142);hydrolase(PC00121);oxidoreductase(PC00176) | Mus musculus |
| MOUSE MGI=MGI=1918951 UniProtKB=Q8K1R3 | PNPT1      | Polyribonucleotide nucleotidyltransferase 1, mitochondrial;Pnpt1;ortholog              | POLYRIBONUCLEOTIDE NUCLEOTIDYLTRANSFERASE 1, MITOCHONDRIAL (PTHR11252:SF0)                | nucleotidyltransferase(PC00174)                                                     | Mus musculus |
| MOUSE MGI=MGI=2143535 UniProtKB=Q8VC97 | BUP1       | Beta-ureidopropionase;Upb1;ortholog                                                    | BETA-UREIDOPROPIONASE (PTHR43674:SF2)                                                     | hydrolase(PC00121)                                                                  | Mus musculus |
| MOUSE MGI=MGI=1913745 UniProtKB=Q9CQZ6 | NDUB3      | NADH dehydrogenase [ubiquinone] 1 beta subcomplex subunit 3;Ndufb3;ortholog            | NADH DEHYDROGENASE [UBIQUINONE] 1 BETA SUBCOMPLEX SUBUNIT 3 (PTHR15082:SF2)               | oxidoreductase(PC00176)                                                             | Mus musculus |
| MOUSE MGI=MGI=1914198 UniProtKB=Q9D7B6 | ACAD8      | Isobutyryl-CoA dehydrogenase, mitochondrial;Acad8;ortholog                             | ISOBUTYRYL-COA DEHYDROGENASE, MITOCHONDRIAL (PTHR43831:SF1)                               | dehydrogenase(PC00092)                                                              | Mus musculus |
| MOUSE MGI=MGI=99778 UniProtKB=Q64521   | GPDM       | Glycerol-3-phosphate dehydrogenase, mitochondrial;Gpd2;ortholog                        | GLYCEROL-3-PHOSPHATE DEHYDROGENASE,                                                       | dehydrogenase(PC00092)                                                              | Mus musculus |

|                                        |       |                                                                                              |                                                                                                |                                 |              |
|----------------------------------------|-------|----------------------------------------------------------------------------------------------|------------------------------------------------------------------------------------------------|---------------------------------|--------------|
|                                        |       | log                                                                                          | MITOCHONDRIAL (PTHR11985:SF15)                                                                 |                                 |              |
| MOUSE MGI=MGI=1277964 UniProtKB=Q9DBM2 | ECHP  | Peroxisomal bifunctional enzyme;Ehahd;ortholog                                               | PEROXISOMAL BIFUNCTIONAL ENZYME (PTHR23309:SF9)                                                | dehydrogenase(PC00092)          | Mus musculus |
| MOUSE MGI=MGI=2384567 UniProtKB=Q91VT4 | CBR4  | Carbonyl reductase family member 4;Cbr4;ortholog                                             | CARBONYL REDUCTASE FAMILY MEMBER 4 (PTHR42760:SF81)                                            | oxidoreductase(PC00176)         | Mus musculus |
| MOUSE MGI=MGI=1916167 UniProtKB=Q9D0S9 | HINT2 | Histidine triad nucleotide-binding protein 2, mitochondrial;Hint2;ortholog                   | HISTIDINE TRIAD NUCLEOTIDE-BINDING PROTEIN 2, MITOCHONDRIAL (PTHR23089:SF18)                   | nucleotide phosphatase(PC00173) | Mus musculus |
| MOUSE MGI=MGI=87929 UniProtKB=P28474   | ADHX  | Alcohol dehydrogenase class-3;Adh5;ortholog                                                  | ALCOHOL DEHYDROGENASE CLASS-3 (PTHR43880:SF4)                                                  | dehydrogenase(PC00092)          | Mus musculus |
| MOUSE MGI=MGI=1929657 UniProtKB=Q9QXE0 | HACL1 | 2-hydroxyacyl-CoA lyase 1;Hacl1;ortholog                                                     | 2-HYDROXYACYL-COA LYASE 1 (PTHR43710:SF2)                                                      | lyase(PC00144)                  | Mus musculus |
| MOUSE MGI=MGI=95852 UniProtKB=P51855   | GSHB  | Glutathione synthetase;Gss;ortholog                                                          | GLUTATHIONE SYNTHETASE (PTHR11130:SF0)                                                         | ligase(PC00142)                 | Mus musculus |
| MOUSE MGI=MGI=1914930 UniProtKB=Q9CQA3 | SDHB  | Succinate dehydrogenase [ubiquinone] iron-sulfur subunit, mitochondrial;Sdhb;ortholog        | SUCCINATE DEHYDROGENASE [UBIQUINONE] IRON-SULFUR SUBUNIT, MITOCHONDRIAL (PTHR11921:SF29)       | dehydrogenase(PC00092)          | Mus musculus |
| MOUSE MGI=MGI=1890410 UniProtKB=Q9QXG4 | ACSA  | Acetyl-coenzyme A synthetase, cytoplasmic;Acsc2;ortholog                                     | ACETYL-COENZYME A SYNTHETASE, CYTOPLASMIC (PTHR24095:SF126)                                    | ligase(PC00142)                 | Mus musculus |
| MOUSE MGI=MGI=1351627 UniProtKB=Q8BKZ9 | ODPX  | Pyruvate dehydrogenase protein X component, mitochondrial;Pdhx;ortholog                      | PYRUVATE DEHYDROGENASE PROTEIN X COMPONENT, MITOCHONDRIAL (PTHR23151:SF57)                     | acetyltransferase(PC00038)      | Mus musculus |
| MOUSE MGI=MGI=1915430 UniProtKB=Q9R1F5 | HYI   | Putative hydroxypyruvate isomerase;Hyi;ortholog                                              | HYDROXYPYRUVATE ISOMERASE-RELATED (PTHR43489:SF6)                                              | isomerase(PC00135)              | Mus musculus |
| MOUSE MGI=MGI=2443582 UniProtKB=P61922 | GABT  | 4-aminobutyrate aminotransferase, mitochondrial;Abat;ortholog                                | 4-AMINO BUTYRATE AMINOTRANSFERASE, MITOCHONDRIAL (PTHR43206:SF1)                               | transaminase(PC00216)           | Mus musculus |
| MOUSE MGI=MGI=1914175 UniProtKB=Q9CXV1 | DHSD  | Succinate dehydrogenase [ubiquinone] cytochrome b small subunit, mitochondrial;Sdhb;ortholog | SUCCINATE DEHYDROGENASE [UBIQUINONE] CYTOCHROME B SMALL SUBUNIT, MITOCHONDRIAL (PTHR13337:SF2) | oxidoreductase(PC00176)         | Mus musculus |
| MOUSE MGI=MGI=95679 UniProtKB=P13707   | GPDA  | Glycerol-3-phosphate dehydrogenase [NAD(+)], cytoplasmic;Gpd1;ortholog                       | GLYCEROL-3-PHOSPHATE DEHYDROGENASE [NAD(+)], CYTOPLASMIC (PTHR11728:SF32)                      | dehydrogenase(PC00092)          | Mus musculus |
| MOUSE MGI=MGI=895149 UniProtKB=P50544  | ACADV | Very long-chain specific acyl-CoA dehydrogenase, mitochondrial;Acadv;ortholog                | VERY LONG-CHAIN SPECIFIC ACYL-COA DEHYDROGENASE, MITOCHONDRIAL (PTHR43884:SF11)                | dehydrogenase(PC00092)          | Mus musculus |
| MOUSE MGI=MGI=2677849 UniProtKB=Q71R19 | KAT3  | Kynurenine--oxoglutarate transaminase 3;Kyat3;ortholog                                       | KYNURENINE--OXOGLUTARATE TRANSAMINASE 3 (PTHR43807:SF6)                                        | transaminase(PC00216)           | Mus musculus |
| MOUSE MGI=MGI=95753 UniProtKB=P26443   | DHE3  | Glutamate dehydrogenase 1, mitochondrial;Glud1;ortholog                                      | GLUTAMATE DEHYDROGENASE 1, MITOCHONDRIAL (PTHR11606:SF13)                                      | dehydrogenase(PC00092)          | Mus musculus |
| MOUSE MGI=MGI=1913666 UniProtKB=Q9Z1P6 | NDUA7 | NADH dehydrogenase [ubiquinone] 1 alpha subcomplex subunit 7;Ndufa7;ortholog                 | NADH DEHYDROGENASE [UBIQUINONE] 1 ALPHA SUBCOMPLEX SUBUNIT 7 (PTHR12485:SF1)                   | oxidoreductase(PC00176)         | Mus musculus |
| MOUSE MGI=MGI=2444085 UniProtKB=Q8QZY2 | GLCTK | Glycerate kinase;Glyctk;ortholog                                                             | GLYCERATE KINASE (PTHR12227:SF0)                                                               | carbohydrate kinase(PC00065)    | Mus musculus |
| MOUSE MGI=MGI=1914380 UniProtKB=Q9CQZ5 | NDUA6 | NADH dehydrogenase [ubiquinone] 1 alpha subcomplex subunit 6;Ndufa6;ortholog                 | NADH DEHYDROGENASE [UBIQUINONE] 1 ALPHA SUBCOMPLEX SUBUNIT 6 (PTHR12964:SF0)                   | dehydrogenase(PC00092)          | Mus musculus |
| MOUSE MGI=MGI=87968 UniProtKB=P50247   | SAHH  | Adenosylhomocysteinase;Ahcy;ortholog                                                         | ADENOSYLHOMOCYSTEINASE (PTHR23420:SF0)                                                         | hydrolase(PC00121)              | Mus musculus |
| MOUSE MGI=MGI=1860517 UniProtKB=Q88451 | RDH7  | Retinol dehydrogenase 7;Rdh7;ortholog                                                        | RETINOL DEHYDROGENASE 16 (PTHR43313:SF11)                                                      | dehydrogenase(PC00092)          | Mus musculus |
| MOUSE MGI=MGI=88017 UniProtKB=Q91X83   | METK1 | S-adenosylmethionine synthase isoform type-1;Mat1a;ortholog                                  | S-ADENOSYLMETHIONINE SYNTHASE ISOFORM TYPE-1 (PTHR11964:SF11)                                  | nucleotidyltransferase(PC00174) | Mus musculus |
| MOUSE MGI=MGI=1919289 UniProtKB=Q99MR8 | MCCA  | Methylcrotonoyl-CoA carboxylase subunit alpha,                                               | METHYLCROTONOYL-COA CARBOXYLASE SUBUNIT ALPHA,                                                 | ligase(PC00142)                 | Mus musculus |

|                                        |          |                                                                                      |                                                                                       |                            |              |
|----------------------------------------|----------|--------------------------------------------------------------------------------------|---------------------------------------------------------------------------------------|----------------------------|--------------|
|                                        |          | mitochondrial;Mccc1;ortholog                                                         | MITOCHONDRIAL-RELATED (PTHR18866:SF33)                                                |                            |              |
| MOUSE MGI=MGI=1343103 UniProtKB=Q9CQ75 | NDUA2    | NADH dehydrogenase [ubiquinone] 1 alpha subcomplex subunit 2;Ndufa2;ortholog         | NADH DEHYDROGENASE [UBIQUINONE] 1 ALPHA SUBCOMPLEX SUBUNIT 2 (PTHR12878:SF4)          | oxidoreductase(PC00176)    | Mus musculus |
| MOUSE MGI=MGI=107686 UniProtKB=Q62425  | NDUA4    | Cytochrome c oxidase subunit NDUFA4;Ndufa4;ortholog                                  | CYTOCHROME C OXIDASE SUBUNIT NDUFA4 (PTHR14256:SF4)                                   | oxidoreductase(PC00176)    | Mus musculus |
| MOUSE MGI=MGI=1277169 UniProtKB=Q9D9V3 | ECHD1    | Ethylmalonyl-CoA decarboxylase;Echdc1;ortholog                                       | ETHYLMALONYL-COA DECARBOXYLASE (PTHR11941:SF27)                                       | lyase(PC00144)             | Mus musculus |
| MOUSE MGI=MGI=96158 UniProtKB=P38060   | HMGCL    | Hydroxymethylglutaryl-CoA lyase, mitochondrial;Hmgcl;ortholog                        | HYDROXYMETHYLGUTARYL-COA LYASE, MITOCHONDRIAL (PTHR42738:SF1)                         | lyase(PC00144)             | Mus musculus |
| MOUSE MGI=MGI=1306824 UniProtKB=Q9Z218 | SUCB2    | Succinate--CoA ligase [GDP-forming] subunit beta, mitochondrial;Suclg2;ortholog      | SUCCINATE--COA LIGASE [GDP-FORMING] SUBUNIT BETA, MITOCHONDRIAL (PTHR11815:SF17)      | ligase(PC00142)            | Mus musculus |
| MOUSE MGI=MGI=1913826 UniProtKB=P99028 | QCR6     | Cytochrome b-c1 complex subunit 6, mitochondrial;Uqcrh;ortholog                      | CYTOCHROME B-C1 COMPLEX SUBUNIT 6, MITOCHONDRIAL (PTHR15336:SF0)                      | reductase(PC00198)         | Mus musculus |
| MOUSE MGI=MGI=88271 UniProtKB=P24270   | CATA     | Catalase;Cat;ortholog                                                                | CATALASE (PTHR11465:SF9)                                                              | peroxidase(PC00180)        | Mus musculus |
| MOUSE MGI=MGI=2442264 UniProtKB=P58044 | IDI1     | Isopentenyl-diphosphate Delta-isomerase 1;Idi1;ortholog                              | ISOPENTENYL-DIPHOSPHATE DELTA-ISOMERASE 1 (PTHR10885:SF5)                             | isomerase(PC00135)         | Mus musculus |
| MOUSE MGI=MGI=1096386 UniProtKB=P51658 | DHB2     | Estradiol 17-beta-dehydrogenase 2;Hsd17b2;ortholog                                   | ESTRADIOL 17-BETA-DEHYDROGENASE 2 (PTHR43313:SF3)                                     | dehydrogenase(PC00092)     | Mus musculus |
| MOUSE MGI=MGI=104990 UniProtKB=P97494  | GSH1     | Glutamate--cysteine ligase catalytic subunit;Gclc;ortholog                           | GLUTAMATE--CYSTEINE LIGASE CATALYTIC SUBUNIT (PTHR11164:SF0)                          | ligase(PC00142)            | Mus musculus |
| MOUSE MGI=MGI=2429497 UniProtKB=Q8VHG0 | FMO4     | Dimethylaniline monooxygenase [N-oxide-forming] 4;Fmo4;ortholog                      | DIMETHYLANILINE MONOOXYGENASE [N-OXIDE-FORMING] 4 (PTHR23023:SF74)                    | oxygenase(PC00177)         | Mus musculus |
| MOUSE MGI=MGI=99538 UniProtKB=Q3UNX5   | ACSM3    | Acyl-coenzyme A synthetase ACSM3, mitochondrial;Acsm3;ortholog                       | ACYL-COENZYME A SYNTHETASE ACSM3, MITOCHONDRIAL (PTHR43605:SF7)                       | ligase(PC00142)            | Mus musculus |
| MOUSE MGI=MGI=95420 UniProtKB=P23953   | ES1,ES1C | Carboxylesterase 1C;Ces1c;ortholog                                                   | CARBOXYLESTERASE 1C-RELATED (PTHR11559:SF192)                                         | esterase(PC00097)          | Mus musculus |
| MOUSE MGI=MGI=1860835 UniProtKB=Q9WTP7 | KAD3     | GTP:AMP phosphotransferase AK3, mitochondrial;Ak3;ortholog                           | GTP:AMP PHOSPHOTRANSFERASE AK3, MITOCHONDRIAL (PTHR23359:SF68)                        | nucleotide kinase(PC00172) | Mus musculus |
| MOUSE MGI=MGI=1861622 UniProtKB=Q9JLJ2 | AL9A1    | 4-trimethylaminobutyraldehyde dehydrogenase;Aldh9a1;ortholog                         | 4-TRIMETHYLAMINOBU TYRALDEHYDE DEHYDROGENASE (PTHR11699:SF228)                        | dehydrogenase(PC00092)     | Mus musculus |
| MOUSE MGI=MGI=88285 UniProtKB=Q91WT9   | CBS      | Cystathionine beta-synthase;Cbs;ortholog                                             | CYSTATHIONINE BETA-SYNTHASE-RELATED (PTHR10314:SF177)                                 | lyase(PC00144)             | Mus musculus |
| MOUSE MGI=MGI=1333871 UniProtKB=O08756 | HCD2     | 3-hydroxyacyl-CoA dehydrogenase type-2;Hsd17b10;ortholog                             | 3-HYDROXYACYL-COA DEHYDROGENASE TYPE-2 (PTHR43658:SF12)                               | oxidoreductase(PC00176)    | Mus musculus |
| MOUSE MGI=MGI=1933427 UniProtKB=P70694 | DHB5     | Estradiol 17 beta-dehydrogenase 5;Akr1c6;ortholog                                    | ALDO-KETO REDUCTASE FAMILY 1 MEMBER C3 (PTHR11732:SF165)                              | reductase(PC00198)         | Mus musculus |
| MOUSE MGI=MGI=1916142 UniProtKB=Q9CRB3 | HIUH     | 5-hydroxyisourate hydrolase;Urah;ortholog                                            | 5-HYDROXYISOURATE HYDROLASE (PTHR10395:SF11)                                          | hydrolase(PC00121)         | Mus musculus |
| MOUSE MGI=MGI=2145458 UniProtKB=Q91WT7 | Q91WT7   | 3-alpha-hydroxysteroid dehydrogenase type 1;Akr1c14;ortholog                         | 3-ALPHA-HYDROXYSTEROID DEHYDROGENASE TYPE 1 (PTHR11732:SF205)                         | reductase(PC00198)         | Mus musculus |
| MOUSE MGI=MGI=2385112 UniProtKB=Q91WD5 | NDUS2    | NADH dehydrogenase [ubiquinone] iron-sulfur protein 2, mitochondrial;Ndufs2;ortholog | NADH DEHYDROGENASE [UBIQUINONE] IRON-SULFUR PROTEIN 2, MITOCHONDRIAL (PTHR11993:SF10) | oxidoreductase(PC00176)    | Mus musculus |
| MOUSE MGI=MGI=3644960 UniProtKB=Q8VCU1 | EST3B    | Carboxylesterase 3B;Ces3b;ortholog                                                   | CARBOXYLESTERASE 3 (PTHR11559:SF259)                                                  | esterase(PC00097)          | Mus musculus |
| MOUSE MGI=MGI=87868 UniProtKB=Q07417   | ACADS    | Short-chain specific acyl-CoA dehydrogenase, mitochondrial;Acads;ortholog            | ISOVALERYL-COA DEHYDROGENASE, MITOCHONDRIAL-RELATED (PTHR43884:SF12)                  | dehydrogenase(PC00092)     | Mus musculus |
| MOUSE MGI=MGI=97831 UniProtKB=Q9D819   | IPYR     | Inorganic pyrophosphatase;Ppa1;ortholog                                              | INORGANIC PYROPHOSPHATASE                                                             | pyrophosphatase(PC00196)   | Mus musculus |

|                                        |       | rtholog                                                                                       | (PTHR10286:SF47)                                                                              |                                   | ulus                |
|----------------------------------------|-------|-----------------------------------------------------------------------------------------------|-----------------------------------------------------------------------------------------------|-----------------------------------|---------------------|
| MOUSE MGI=MGI=1913468 UniProtKB=Q9CQJ8 | NDUB9 | NADH dehydrogenase [ubiquinone] 1 beta subcomplex subunit 9;Ndufb9;ortholog                   | NADH DEHYDROGENASE [UBIQUINONE] 1 BETA SUBCOMPLEX SUBUNIT 9 (PTHR12868:SF0)                   | oxidoreductase(PC00176)           | Mus<br>musc<br>ulus |
| MOUSE MGI=MGI=2136381 UniProtKB=Q99JY0 | ECHB  | Trifunctional enzyme subunit beta, mitochondrial;Hadhb;ortholog                               | TRIFUNCTIONAL ENZYME SUBUNIT BETA, MITOCHONDRIAL (PTHR18919:SF153)                            | acyltransferase(PC00042)          | Mus<br>musc<br>ulus |
| MOUSE MGI=MGI=1920974 UniProtKB=Q9D115 | MCEE  | Methylmalonyl-CoA epimerase, mitochondrial;Mcee;ortholog                                      | METHYLMALONYL-COA EPIMERASE, MITOCHONDRIAL (PTHR43048:SF3)                                    | epimerase/racemase(PC00096)       | Mus<br>musc<br>ulus |
| MOUSE MGI=MGI=107796 UniProtKB=Q8CG76  | ARK72 | Aflatoxin B1 aldehyde reductase member 2;Akr7a2;ortholog                                      | AFLATOXIN B1 ALDEHYDE REDUCTASE MEMBER 2 (PTHR43625:SF12)                                     | reductase(PC00198)                | Mus<br>musc<br>ulus |
| MOUSE MGI=MGI=2385079 UniProtKB=Q8K3J1 | NDUS8 | NADH dehydrogenase [ubiquinone] iron-sulfur protein 8, mitochondrial;Ndufs8;ortholog          | NADH DEHYDROGENASE [UBIQUINONE] IRON-SULFUR PROTEIN 8, MITOCHONDRIAL (PTHR10849:SF20)         | oxidoreductase(PC00176)           | Mus<br>musc<br>ulus |
| MOUSE MGI=MGI=1197006 UniProtKB=Q9D826 | SOX   | Peroxisomal sarcosine oxidase;Pipox;ortholog                                                  | PEROXISOMAL SARCOSINE OXIDASE (PTHR10961:SF7)                                                 | oxidase(PC00175)                  | Mus<br>musc<br>ulus |
| MOUSE MGI=MGI=95492 UniProtKB=Q9QXD6   | F16P1 | Fructose-1,6-bisphosphatase 1;Fbp1;ortholog                                                   | FRUCTOSE-1,6-BISPHOSPHATASE 1 (PTHR11556:SF11)                                                | carbohydrate phosphatase(PC00066) | Mus<br>musc<br>ulus |
| MOUSE MGI=MGI=1915921 UniProtKB=Q922E4 | PCY2  | Ethanolamine-phosphate cytidyltransferase;Pcyt2;ortholog                                      | ETHANOLAMINE-PHOSPHATE CYTIDYLTRANSFERASE (PTHR45780:SF2)                                     | nucleotidyltransferase(PC00174)   | Mus<br>musc<br>ulus |
| MOUSE MGI=MGI=2384968 UniProtKB=Q91YP0 | L2HDH | L-2-hydroxyglutarate dehydrogenase, mitochondrial;L2hgdh;ortholog                             | L-2-HYDROXYGLUTARATE DEHYDROGENASE, MITOCHONDRIAL (PTHR43104:SF2)                             | dehydrogenase(PC00092)            | Mus<br>musc<br>ulus |
| MOUSE MGI=MGI=2182591 UniProtKB=Q3URE1 | ACSF3 | Acyl-CoA synthetase family member 3, mitochondrial;Acsf3;ortholog                             | ACYL-COA SYNTHETASE FAMILY MEMBER 3, MITOCHONDRIAL (PTHR24096:SF267)                          | ligase(PC00142)                   | Mus<br>musc<br>ulus |
| MOUSE MGI=MGI=97043 UniProtKB=P06801   | MAOX  | NADP-dependent malic enzyme;Me1;ortholog                                                      | NADP-DEPENDENT MALIC ENZYME (PTHR23406:SF17)                                                  | oxidoreductase(PC00176)           | Mus<br>musc<br>ulus |
| MOUSE MGI=MGI=102504 UniProtKB=P00397  | COX1  | Cytochrome c oxidase subunit 1;Mtco1;ortholog                                                 | CYTOCHROME C OXIDASE SUBUNIT 1 (PTHR10422:SF18)                                               | oxidase(PC00175)                  | Mus<br>musc<br>ulus |
| MOUSE MGI=MGI=2444835 UniProtKB=Q8BGC4 | PTGR3 | Prostaglandin reductase-3;Zadh2;ortholog                                                      | PROSTAGLANDIN REDUCTASE 3 (PTHR43677:SF3)                                                     | oxidoreductase(PC00176)           | Mus<br>musc<br>ulus |
| MOUSE MGI=MGI=1916406 UniProtKB=Q8BIG7 | CMTD1 | Catechol O-methyltransferase domain-containing protein 1;Comtd1;ortholog                      | CATECHOL O-METHYLTRANSFERASE DOMAIN-CONTAINING PROTEIN 1 (PTHR10509:SF14)                     | methyltransferase(PC00155)        | Mus<br>musc<br>ulus |
| MOUSE MGI=MGI=97798 UniProtKB=Q05769   | COX2  | Prostaglandin G/H synthase 2;Ptgs2;ortholog                                                   | PROSTAGLANDIN G/H SYNTHASE 2 (PTHR11903:SF8)                                                  | oxygenase(PC00177)                | Mus<br>musc<br>ulus |
| MOUSE MGI=MGI=1914154 UniProtKB=Q99MN9 | PCCB  | Propionyl-CoA carboxylase beta chain, mitochondrial;Pccb;ortholog                             | PROPIONYL-COA CARBOXYLASE BETA CHAIN, MITOCHONDRIAL (PTHR43842:SF2)                           | ligase(PC00142)                   | Mus<br>musc<br>ulus |
| MOUSE MGI=MGI=88589 UniProtKB=P00186   | CP1A2 | Cytochrome P450 1A2;Cyp1a2;ortholog                                                           | CYTOCHROME P450 1A2 (PTHR24299:SF12)                                                          | oxygenase(PC00177)                | Mus<br>musc<br>ulus |
| MOUSE MGI=MGI=104888 UniProtKB=Q920E5  | FPPS  | Farnesyl pyrophosphate synthase;Fdps;ortholog                                                 | FARNESYL PYROPHOSPHATE SYNTHASE (PTHR11525:SF0)                                               | acyltransferase(PC00042)          | Mus<br>musc<br>ulus |
| MOUSE MGI=MGI=1914523 UniProtKB=Q99LC3 | NDUAA | NADH dehydrogenase [ubiquinone] 1 alpha subcomplex subunit 10, mitochondrial;Ndufa10;ortholog | NADH DEHYDROGENASE [UBIQUINONE] 1 ALPHA SUBCOMPLEX SUBUNIT 10, MITOCHONDRIAL (PTHR10513:SF15) | nucleotide kinase(PC00172)        | Mus<br>musc<br>ulus |
| MOUSE MGI=MGI=98352 UniProtKB=P09671   | SODM  | Superoxide dismutase [Mn], mitochondrial;Sod2;ortholog                                        | SUPEROXIDE DISMUTASE [MN], MITOCHONDRIAL (PTHR11404:SF6)                                      | oxidoreductase(PC00176)           | Mus<br>musc<br>ulus |
| MOUSE MGI=MGI=2685720 UniProtKB=Q14DH7 | ACSS3 | Acyl-CoA synthetase short-chain family member 3, mitochondrial;Acss3;ortholog                 | ACYL-COA SYNTHETASE SHORT-CHAIN FAMILY MEMBER 3, MITOCHONDRIAL (PTHR43347:SF3)                | ligase(PC00142)                   | Mus<br>musc<br>ulus |
| MOUSE MGI=MGI=2442664 UniProtKB=Q8CC86 | PNCB  | Nicotinate phosphoribosyltransferase;Naprt;ortholog                                           | NICOTINATE PHOSPHORIBOSYLTRANSFERASE (PTHR11098:SF1)                                          | glycosyltransferase(PC00111)      | Mus<br>musc<br>ulus |
| MOUSE MGI=MGI=98852 UniProtKB=P52196   | THTR  | Thiosulfate sulfurtransferase;Tst;ortholog                                                    | THIOSULFATE SULFURTRANSFERASE (PTHR11364:SF6)                                                 | transferase(PC00220)              | Mus<br>musc<br>ulus |
| MOUSE MGI=MGI=99500 UniProtKB=P34914   | HYES  | Bifunctional epoxide hydrolase                                                                | BIFUNCTIONAL EPOXIDE HYDROLASE                                                                | hydrolase(PC00121)                | Mus<br>musc         |

|                                        |       |                                                                                        |                                                                                           |                             |              |
|----------------------------------------|-------|----------------------------------------------------------------------------------------|-------------------------------------------------------------------------------------------|-----------------------------|--------------|
|                                        |       | 2;Ephx2;ortholog                                                                       | 2 (PTHR43329:SF4)                                                                         |                             | ulus         |
| MOUSE MGI=MGI=1349389 UniProtKB=O88986 | KBL   | 2-amino-3-ketobutyrate coenzyme A ligase, mitochondrial;Gcat;ortholog                  | 2-AMINO-3-KETOBUTYRATE COENZYME A LIGASE, MITOCHONDRIAL (PTHR12693:SF60)                  | transaminase(PC00216)       | Mus musculus |
| MOUSE MGI=MGI=1915452 UniProtKB=Q9CPP6 | NDUA5 | NADH dehydrogenase [ubiquinone] 1 alpha subcomplex subunit 5;Ndufa5;ortholog           | NADH DEHYDROGENASE [UBIQUINONE] 1 ALPHA SUBCOMPLEX SUBUNIT 5 (PTHR12653:SF0)              | oxidoreductase(PC00176)     | Mus musculus |
| MOUSE MGI=MGI=1915625 UniProtKB=Q9DCJ5 | NDUA8 | NADH dehydrogenase [ubiquinone] 1 alpha subcomplex subunit 8;Ndufa8;ortholog           | NADH DEHYDROGENASE [UBIQUINONE] 1 ALPHA SUBCOMPLEX SUBUNIT 8 (PTHR13344:SF0)              | dehydrogenase(PC00092)      | Mus musculus |
| MOUSE MGI=MGI=102581 UniProtKB=Q9QYF1  | RDH11 | Retinol dehydrogenase 11;Rdh11;ortholog                                                | RETINOL DEHYDROGENASE 11 (PTHR24320:SF108)                                                | dehydrogenase(PC00092)      | Mus musculus |
| MOUSE MGI=MGI=1340024 UniProtKB=Q8R0Y6 | AL1L1 | Cytosolic 10-formyltetrahydrofolate dehydrogenase;Aldh11;ortholog                      | CYTOSOLIC 10-FORMYLTETRAHYDROFOLATE DEHYDROGENASE (PTHR11699:SF120)                       | dehydrogenase(PC00092)      | Mus musculus |
| MOUSE MGI=MGI=1922656 UniProtKB=Q9DC70 | NDUS7 | NADH dehydrogenase [ubiquinone] iron-sulfur protein 7, mitochondrial;Ndufs7;ortholog   | NADH DEHYDROGENASE [UBIQUINONE] IRON-SULFUR PROTEIN 7, MITOCHONDRIAL (PTHR11995:SF14)     | dehydrogenase(PC00092)      | Mus musculus |
| MOUSE MGI=MGI=2443170 UniProtKB=Q8BK48 | EST2E | Pyrethroid hydrolase Ces2e;Ces2e;ortholog                                              | ACYLCARNITINE HYDROLASE-RELATED (PTHR11559:SF400)                                         | esterase(PC00097)           | Mus musculus |
| MOUSE MGI=MGI=106100 UniProtKB=Q921G7  | ETFD  | Electron transfer flavoprotein-ubiquinone oxidoreductase, mitochondrial;Etfhd;ortholog | ELECTRON TRANSFER FLAVOPROTEIN-UBIQUINONE OXIDOREDUCTASE, MITOCHONDRIAL (PTHR10617:SF107) | oxidoreductase(PC00176)     | Mus musculus |
| MOUSE MGI=MGI=1350916 UniProtKB=Q8VVK1 | NIT1  | Deaminated glutathione amidase;Nit1;ortholog                                           | DEAMINATED GLUTATHIONE AMIDASE (PTHR23088:SF27)                                           | hydrolase(PC00121)          | Mus musculus |
| MOUSE MGI=MGI=2652816 UniProtKB=Q3U0B3 | DHR11 | Dehydrogenase/reductase SDR family member 11;Dhrs11;ortholog                           | DEHYDROGENASE/REDUCTASE SDR FAMILY MEMBER 11 (PTHR43115:SF4)                              | oxidoreductase(PC00176)     | Mus musculus |
| MOUSE MGI=MGI=97050 UniProtKB=P08249   | MDHM  | Malate dehydrogenase, mitochondrial;Mdh2;ortholog                                      | MALATE DEHYDROGENASE, MITOCHONDRIAL (PTHR11540:SF16)                                      | dehydrogenase(PC00092)      | Mus musculus |
| MOUSE MGI=MGI=1347050 UniProtKB=Q35945 | AL1A7 | Aldehyde dehydrogenase, cytosolic 1;Aldh1a7;ortholog                                   | ALDEHYDE DEHYDROGENASE, CYTOSOLIC 1 (PTHR11699:SF221)                                     | dehydrogenase(PC00092)      | Mus musculus |
| MOUSE MGI=MGI=2152200 UniProtKB=Q91VA0 | ACSM1 | Acyl-coenzyme A synthetase ACSM1, mitochondrial;Acsm1;ortholog                         | ACYL-COENZYME A SYNTHETASE ACSM1, MITOCHONDRIAL (PTHR43605:SF5)                           | ligase(PC00142)             | Mus musculus |
| MOUSE MGI=MGI=1916876 UniProtKB=Q5M8N4 | D39U1 | Epimerase family protein SDR39U1;Sdr39u1;ortholog                                      | EPIMERASE FAMILY PROTEIN SDR39U1 (PTHR11092:SF0)                                          | epimerase/racemase(PC00096) | Mus musculus |
| MOUSE MGI=MGI=1918914 UniProtKB=Q9DD20 | MET7B | Methyltransferase-like protein 7B;Mettl7b;ortholog                                     | METHYLTRANSFERASE E-LIKE PROTEIN 7B (PTHR42912:SF14)                                      | methyltransferase(PC00155)  | Mus musculus |
| MOUSE MGI=MGI=88070 UniProtKB=Q61176   | ARG11 | Arginase-1;Arg1;ortholog                                                               | ARGINASE-1 (PTHR43782:SF2)                                                                | hydrolase(PC00121)          | Mus musculus |
| MOUSE MGI=MGI=1098643 UniProtKB=Q9CX10 | COQ5  | 2-methoxy-6-polyprenyl-1,4-benzoquinol methylase, mitochondrial;Coq5;ortholog          | 2-METHOXY-6-POLYPRENYL-1,4-BENZOQUINOL METHYLASE, MITOCHONDRIAL (PTHR43591:SF24)          | methyltransferase(PC00155)  | Mus musculus |
| MOUSE MGI=MGI=102496 UniProtKB=P03921  | NU5M  | NADH-ubiquinone oxidoreductase chain 5;Mtnd5;ortholog                                  | NADH-UBIQUINONE OXIDOREDUCTASE CHAIN 5 (PTHR42829:SF2)                                    | oxidoreductase(PC00176)     | Mus musculus |
| MOUSE MGI=MGI=1915337 UniProtKB=Q8BHC4 | DCAKD | Dephospho-CoA kinase domain-containing protein;Dcakd;ortholog                          | BIFUNCTIONAL COENZYME A SYNTHASE-RELATED (PTHR10695:SF46)                                 | kinase(PC00137)             | Mus musculus |
| MOUSE MGI=MGI=88034 UniProtKB=P20108   | PRDX3 | Thioredoxin-dependent peroxide reductase, mitochondrial;Prdx3;ortholog                 | THIOREDOXIN-DEPENDENT PEROXIDE REDUCTASE, MITOCHONDRIAL (PTHR42801:SF4)                   | peroxidase(PC00180)         | Mus musculus |
| MOUSE MGI=MGI=95802 UniProtKB=Q8QZR5   | ALAT1 | Alanine aminotransferase 1;Gpt;ortholog                                                | ALANINE AMINOTRANSFERASE 1 (PTHR11751:SF308)                                              | transaminase(PC00216)       | Mus musculus |
| MOUSE MGI=MGI=99523 UniProtKB=P35700   | PRDX1 | Peroxioredoxin-1;Prdx1;ortholog                                                        | PEROXIREDOXIN-1 (PTHR10681:SF111)                                                         | peroxidase(PC00180)         | Mus musculus |
| MOUSE MGI=MGI=88609 UniProtKB=Q64459   | CP3AB | Cytochrome P450 3A11;Cyp3a11;ortholog                                                  | CYTOCHROME P450 3A11-RELATED (PTHR24302:SF33)                                             | oxygenase(PC00177)          | Mus musculus |

|                                        |       |                                                                                            |                                                                                            |                                           |          |
|----------------------------------------|-------|--------------------------------------------------------------------------------------------|--------------------------------------------------------------------------------------------|-------------------------------------------|----------|
| MOUSE MGI=MGI=2653900 UniProtKB=Q8BH00 | AL8A1 | 2-aminomuconic semialdehyde dehydrogenase;Aldh8a1;ortholog                                 | 2-AMINOMUCONIC SEMIALDEHYDE DEHYDROGENASE (PTHR43720:SF2)                                  | dehydrogenase(PC00092)                    | Musculus |
| MOUSE MGI=MGI=1914514 UniProtKB=Q9D6J5 | NDUB8 | NADH dehydrogenase [ubiquinone] 1 beta subcomplex subunit 8, mitochondrial;Ndufb8;ortholog | NADH DEHYDROGENASE [UBIQUINONE] 1 BETA SUBCOMPLEX SUBUNIT 8, MITOCHONDRIAL (PTHR12840:SF1) | oxidoreductase(PC00176)                   | Musculus |
| MOUSE MGI=MGI=2142491 UniProtKB=Q8QZR3 | EST2A | Pyrethroid hydrolase Ces2a;Ces2a;ortholog                                                  | PYRETHROID HYDROLASE CES2A (PTHR11559:SF174)                                               | esterase(PC00097)                         | Musculus |
| MOUSE MGI=MGI=1298381 UniProtKB=O35215 | DOPD  | D-dopachrome decarboxylase;Ddt;ortholog                                                    | D-DOPACHROME DECARBOXYLASE (PTHR11954:SF22)                                                | decarboxylase(PC00089)                    | Musculus |
| MOUSE MGI=MGI=1928679 UniProtKB=Q9EQF5 | DPYS  | Dihydropyrimidinase;Dpys;ortholog                                                          | DIHYDROPYRIMIDINASE (PTHR11647:SF50)                                                       | hydrolase(PC00121)                        | Musculus |
| MOUSE MGI=MGI=88084 UniProtKB=Q91Y10   | ARLY  | Argininosuccinate lyase;Asl;ortholog                                                       | ARGININOSUCCINATE LYASE (PTHR43814:SF1)                                                    | lyase(PC00144)                            | Musculus |
| MOUSE MGI=MGI=106098 UniProtKB=Q9DCW4  | ETFB  | Electron transfer flavoprotein subunit beta;Etfb;ortholog                                  | ELECTRON TRANSFER FLAVOPROTEIN SUBUNIT BETA (PTHR21294:SF8)                                | hydroxylase(PC00122)                      | Musculus |
| MOUSE MGI=MGI=102773 UniProtKB=Q63880  | EST3A | Carboxylesterase 3A;Ces3a;ortholog                                                         | CARBOXYLESTERASE 3 (PTHR11559:SF259)                                                       | esterase(PC00097)                         | Musculus |
| MOUSE MGI=MGI=1923488 UniProtKB=Q91Z53 | GRHPR | Glyoxylate reductase/hydroxypyruvate reductase;Grhpr;ortholog                              | GLYOXYLATE REDUCTASE/HYDROXYPYRUVATE REDUCTASE (PTHR10996:SF137)                           | dehydrogenase(PC00092)                    | Musculus |
| MOUSE MGI=MGI=1914084 UniProtKB=Q9CQR4 | ACO13 | Acyl-coenzyme A thioesterase 13;Acot13;ortholog                                            | ACYL-COENZYME A THIOESTERASE 13 (PTHR21660:SF1)                                            | esterase(PC00097)                         | Musculus |
| MOUSE MGI=MGI=1913321 UniProtKB=Q9DCM0 | ETHE1 | Persulfide dioxygenase ETHE1, mitochondrial;Ethe1;ortholog                                 | PERSULFIDE DIOXYGENASE ETHE1, MITOCHONDRIAL (PTHR43084:SF1)                                | oxygenase(PC00177)                        | Musculus |
| MOUSE MGI=MGI=99600 UniProtKB=P47738   | ALDH2 | Aldehyde dehydrogenase, mitochondrial;Aldh2;ortholog                                       | ALDEHYDE DEHYDROGENASE, MITOCHONDRIAL (PTHR11699:SF233)                                    | dehydrogenase(PC00092)                    | Musculus |
| MOUSE MGI=MGI=1913296 UniProtKB=Q9CQH3 | NDUB5 | NADH dehydrogenase [ubiquinone] 1 beta subcomplex subunit 5, mitochondrial;Ndufb5;ortholog | NADH DEHYDROGENASE [UBIQUINONE] 1 BETA SUBCOMPLEX SUBUNIT 5, MITOCHONDRIAL (PTHR13178:SF0) | oxidoreductase(PC00176)                   | Musculus |
| MOUSE MGI=MGI=107807 UniProtKB=Q9CQ69  | QCR8  | Cytochrome b-c1 complex subunit 8;Uqcrc;ortholog                                           | CYTOCHROME B-C1 COMPLEX SUBUNIT 8 (PTHR12119:SF2)                                          | oxidoreductase(PC00176)                   | Musculus |
| MOUSE MGI=MGI=88378 UniProtKB=Q8VCC2   | EST1  | Liver carboxylesterase 1;Ces1;ortholog                                                     | LIVER CARBOXYLESTERASE 1-RELATED (PTHR11559:SF179)                                         | esterase(PC00097)                         | Musculus |
| MOUSE MGI=MGI=1918993 UniProtKB=Q9DBL7 | COASY | Bifunctional coenzyme A synthase;Coasy;ortholog                                            | BIFUNCTIONAL COENZYME A SYNTHASE-RELATED (PTHR10695:SF46)                                  | kinase(PC00137)                           | Musculus |
| MOUSE MGI=MGI=2135593 UniProtKB=Q8BMS1 | ECHA  | Trifunctional enzyme subunit alpha, mitochondrial;Hadha;ortholog                           | TRIFUNCTIONAL ENZYME SUBUNIT ALPHA, MITOCHONDRIAL (PTHR43612:SF3)                          | dehydrogenase(PC00092);hydratase(PC00120) | Musculus |
| MOUSE MGI=MGI=95739 UniProtKB=P15105   | GLNA  | Glutamine synthetase;Glu;ortholog                                                          | GLUTAMINE SYNTHETASE (PTHR20852:SF45)                                                      | ligase(PC00142)                           | Musculus |
| MOUSE MGI=MGI=97499 UniProtKB=Q91ZA3   | PCCA  | Propionyl-CoA carboxylase alpha chain, mitochondrial;Pcca;ortholog                         | METHYLCROTONOYL-COA CARBOXYLASE SUBUNIT ALPHA, MITOCHONDRIAL-RELATED (PTHR18866:SF33)      | ligase(PC00142)                           | Musculus |
| MOUSE MGI=MGI=95513 UniProtKB=P22315   | HEMH  | Ferrochelatase, mitochondrial;Fech;ortholog                                                | FERROCHELATASE, MITOCHONDRIAL (PTHR11108:SF1)                                              | lyase(PC00144)                            | Musculus |
| MOUSE MGI=MGI=101813 UniProtKB=Q8BMS4  | COQ3  | Ubiquinone biosynthesis O-methyltransferase, mitochondrial;Coq3;ortholog                   | UBIQUINONE BIOSYNTHESIS O-METHYLTRANSFERASE, MITOCHONDRIAL (PTHR43464:SF19)                | methyltransferase(PC00155)                | Musculus |
| MOUSE MGI=MGI=2443241 UniProtKB=Q91VD9 | NDUS1 | NADH-ubiquinone oxidoreductase 75 kDa subunit, mitochondrial;Ndufs1;ortholog               | NADH-UBIQUINONE OXIDOREDUCTASE 75 KDA SUBUNIT, MITOCHONDRIAL (PTHR11615:SF6)               | dehydrogenase(PC00092)                    | Musculus |
| MOUSE MGI=MGI=106916 UniProtKB=Q9D6Y7  | MSRA  | Mitochondrial peptide methionine sulfoxide reductase;Msra;ortholog                         | MITOCHONDRIAL PEPTIDE METHIONINE SULFOXIDE REDUCTASE (PTHR42799:SF2)                       | reductase(PC00198)                        | Musculus |
| MOUSE MGI=MGI=2444086 UniProtKB=Q8BGA8 | ACSM5 | Acyl-coenzyme A synthetase ACSM5, mitochondrial;Acsm5;ortholog                             | ACYL-COENZYME A SYNTHETASE ACSM5, MITOCHONDRIAL (PTHR43605:SF6)                            | ligase(PC00142)                           | Musculus |



|                                        |        |                                                                                       |                                                                                      |                                                 |              |
|----------------------------------------|--------|---------------------------------------------------------------------------------------|--------------------------------------------------------------------------------------|-------------------------------------------------|--------------|
| MOUSE MGI=MGI=894320 UniProtKB=O08709  | PRDX6  | Peroxioredoxin-6;Prdx6;ortholog                                                       | MCG48959-RELATED (PTHR43503:SF4)                                                     | peroxidase(PC00180)                             | Mus musculus |
| MOUSE MGI=MGI=104724 UniProtKB=Q61578  | ADRO   | NADPH:adrenodoxin oxidoreductase, mitochondrial;Fdxr;ortholog                         | NADPH:ADRENODOXIN OXIDOREDUCTASE, MITOCHONDRIAL (PTHR11938:SF91)                     | oxidoreductase(PC00176)                         | Mus musculus |
| MOUSE MGI=MGI=1261838 UniProtKB=Q9JHW2 | NIT2   | Omega-amidase NIT2;Nit2;ortholog                                                      | OMEGA-AMIDASE NIT2 (PTHR23088:SF30)                                                  | hydrolase(PC00121)                              | Mus musculus |
| MOUSE MGI=MGI=106428 UniProtKB=Q7TNG8  | LDHD   | Probable D-lactate dehydrogenase, mitochondrial;Ldhd;ortholog                         | D-LACTATE DEHYDROGENASE, MITOCHONDRIAL-RELATED (PTHR11748:SF111)                     | dehydrogenase(PC00092)                          | Mus musculus |
| MOUSE MGI=MGI=1329033 UniProtKB=Q35423 | SPYA   | Serine--pyruvate aminotransferase, mitochondrial;Agxt;ortholog                        | SERINE--PYRUVATE AMINOTRANSFERASE (PTHR21152:SF24)                                   | transaminase(PC00216)                           | Mus musculus |
| MOUSE MGI=MGI=1100496 UniProtKB=P97501 | FMO3   | Dimethylaniline monooxygenase [N-oxide-forming] 3;Fmo3;ortholog                       | DIMETHYLANILINE MONOOXYGENASE [N-OXIDE-FORMING] 3 (PTHR23023:SF44)                   | oxygenase(PC00177)                              | Mus musculus |
| MOUSE MGI=MGI=1915391 UniProtKB=Q8BGT5 | ALAT2  | Alanine aminotransferase 2;Gpt2;ortholog                                              | ALANINE AMINOTRANSFERASE 2 (PTHR11751:SF311)                                         | transaminase(PC00216)                           | Mus musculus |
| MOUSE MGI=MGI=1921364 UniProtKB=Q9DC50 | OCTC   | Peroxisomal carnitine O-octanoyltransferase;Crot;ortholog                             | PEROXISOMAL CARNITINE O-OCTANOYLTRANSFERASE (PTHR22589:SF67)                         | acyltransferase(PC00042)                        | Mus musculus |
| MOUSE MGI=MGI=1915077 UniProtKB=Q9EQ20 | MMSA   | Methylmalonate-semialdehyde dehydrogenase [acylating], mitochondrial;Aldh6a1;ortholog | METHYLMALONATE-SEMIALDEHYDE DEHYDROGENASE [ACYLATING], MITOCHONDRIAL (PTHR43866:SF3) | dehydrogenase(PC00092)                          | Mus musculus |
| MOUSE MGI=MGI=1345167 UniProtKB=Q9WVM8 | AADAT  | Kynurenine/alpha-aminoadipate aminotransferase, mitochondrial;Aadat;ortholog          | KYNURENINE/ALPHA-AMINOADIPATE AMINOTRANSFERASE, MITOCHONDRIAL (PTHR42790:SF3)        | transaminase(PC00216)                           | Mus musculus |
| MOUSE MGI=MGI=97402 UniProtKB=P00860   | ODC    | Ornithine decarboxylase;Odc1;ortholog                                                 | ORNITHINE DECARBOXYLASE (PTHR11482:SF42)                                             | decarboxylase(PC00089)                          | Mus musculus |
| MOUSE MGI=MGI=1346042 UniProtKB=Q35678 | MGLL   | Monoglyceride lipase;Mgll;ortholog                                                    | MONOGLYCERIDE LIPASE (PTHR11614:SF87)                                                | phospholipase(PC00186)                          | Mus musculus |
| MOUSE MGI=MGI=103078 UniProtKB=Q64105  | SPRE   | Sepiapterin reductase;Spr;ortholog                                                    | SEPIAPTERIN REDUCTASE (PTHR44085:SF2)                                                | reductase(PC00198)                              | Mus musculus |
| MOUSE MGI=MGI=1098623 UniProtKB=Q8BWT1 | THIM   | 3-ketoacyl-CoA thiolase, mitochondrial;Acaa2;ortholog                                 | 3-KETOACYL-COA THIOLASE, MITOCHONDRIAL (PTHR18919:SF107)                             | acyltransferase(PC00042)                        | Mus musculus |
| MOUSE MGI=MGI=2136460 UniProtKB=Q8BH95 | ECHM   | Enoyl-CoA hydratase, mitochondrial;Echs1;ortholog                                     | ENOYL-COA HYDRATASE, MITOCHONDRIAL (PTHR11941:SF54)                                  | lyase(PC00144)                                  | Mus musculus |
| MOUSE MGI=MGI=1338800 UniProtKB=Q9Z0S1 | BPNT1  | 3'(2'),5'-bisphosphate nucleotidase 1;Bpnt1;ortholog                                  | 3'(2'),5'-BISPHOSPHATE NUCLEOTIDASE 1 (PTHR43028:SF5)                                | phosphatase(PC00181)                            | Mus musculus |
| MOUSE MGI=MGI=1922828 UniProtKB=A2AJL3 | FGGY   | FGGY carbohydrate kinase domain-containing protein;Fggy;ortholog                      | FGGY CARBOHYDRATE KINASE DOMAIN-CONTAINING PROTEIN (PTHR43435:SF4)                   | carbohydrate kinase(PC00065)                    | Mus musculus |
| MOUSE MGI=MGI=1338011 UniProtKB=Q9JLZ3 | AUHM   | Methylglutaconyl-CoA hydratase, mitochondrial;Auh;ortholog                            | METHYLG LUTACONYL-COA HYDRATASE, MITOCHONDRIAL (PTHR11941:SF12)                      | lyase(PC00144)                                  | Mus musculus |
| MOUSE MGI=MGI=1330223 UniProtKB=O88428 | PAPS2  | Bifunctional 3'-phosphoadenosine 5'-phosphosulfate synthase 2;Papss2;ortholog         | BIFUNCTIONAL 3'-PHOSPHOADENOSINE 5'-PHOSPHOSULFATE SYNTHASE 2 (PTHR11055:SF16)       | kinase(PC00137);nucleotidyltransferase(PC00174) | Mus musculus |
| MOUSE MGI=MGI=96112 UniProtKB=P22907   | HEM3   | Porphobilinogen deaminase;Hmbs;ortholog                                               | PORPHOBILINOGEN DEAMINASE (PTHR11557:SF0)                                            | deaminase(PC00088)                              | Mus musculus |
| MOUSE MGI=MGI=88594 UniProtKB=Q9DBG1   | CP27A  | Sterol 26-hydroxylase, mitochondrial;Cyp27a1;ortholog                                 | STEROL 26-HYDROXYLASE, MITOCHONDRIAL (PTHR24291:SF6)                                 | oxygenase(PC00177)                              | Mus musculus |
| MOUSE Gene=Ndufb1 UniProtKB=P0DN34     | NDUB1  | NADH dehydrogenase [ubiquinone] 1 beta subcomplex subunit 1;Ndufb1;ortholog           | NADH DEHYDROGENASE [UBIQUINONE] 1 BETA SUBCOMPLEX SUBUNIT 1 (PTHR15222:SF2)          | dehydrogenase(PC00092)                          | Mus musculus |
| MOUSE MGI=MGI=102503 UniProtKB=P00405  | COX2   | Cytochrome c oxidase subunit 2;Mtco2;ortholog                                         | CYTOCHROME C OXIDASE SUBUNIT 2 (PTHR22888:SF9)                                       | oxidoreductase(PC00176)                         | Mus musculus |
| MOUSE MGI=MGI=1914135 UniProtKB=Q9DBL1 | ACDSB  | Short/branched chain specific acyl-CoA dehydrogenase, mitochondrial;Acadsb;ortholog   | SHORT/BRANCHED CHAIN SPECIFIC ACYL-COA DEHYDROGENASE, MITOCHONDRIAL (PTHR43884:SF1)  | dehydrogenase(PC00092)                          | Mus musculus |
| MOUSE MGI=MGI=1277989 UniProtKB=Q9CZN7 | Q9CZN7 | Serine hydroxymethyltransferase                                                       | SERINE HYDROXYMETHYLTRANSFERASE                                                      | methyltransferase(PC00155)                      | Mus musculus |

|                                        |       |                                                                                                                       |                                                                                                                          |                             |              |
|----------------------------------------|-------|-----------------------------------------------------------------------------------------------------------------------|--------------------------------------------------------------------------------------------------------------------------|-----------------------------|--------------|
|                                        |       | mitochondrial;Shmt2;ortholog                                                                                          | MITOCHONDRIAL (PTHR11680:SF28)                                                                                           |                             |              |
| MOUSE MGI=MGI=88090 UniProtKB=P16460   | ASSY  | Argininosuccinate synthase;Ass1;ortholog                                                                              | ARGININOSUCCINATE SYNTHASE (PTHR11587:SF2)                                                                               | ligase(PC00142)             | Mus musculus |
| MOUSE MGI=MGI=97520 UniProtKB=Q05920   | PYC   | Pyruvate carboxylase, mitochondrial;Pc;ortholog                                                                       | PYRUVATE CARBOXYLASE, MITOCHONDRIAL (PTHR43778:SF2)                                                                      | ligase(PC00142)             | Mus musculus |
| MOUSE MGI=MGI=108388 UniProtKB=P97364  | SPS2  | Selenide, water dikinase 2;Seps2;ortholog                                                                             | SELENIDE, WATER DIKINASE 2 (PTHR10256:SF1)                                                                               | transferase(PC00220)        | Mus musculus |
| MOUSE MGI=MGI=1921435 UniProtKB=Q9D6Y9 | GLGB  | 1,4-alpha-glucan-branching enzyme;Gbe1;ortholog                                                                       | 1,4-ALPHA-GLUCAN-BRANCHING ENZYME (PTHR43651:SF3)                                                                        | amylase(PC00048)            | Mus musculus |
| MOUSE MGI=MGI=88470 UniProtKB=O88587   | COMT  | Catechol O-methyltransferase;Comt;ortholog                                                                            | CATECHOL O-METHYLTRANSFERASE (PTHR43836:SF3)                                                                             | methyltransferase(PC00155)  | Mus musculus |
| MOUSE MGI=MGI=1929093 UniProtKB=Q8VCZ9 | HYPDH | Hydroxyproline dehydrogenase;Prodh2;ortholog                                                                          | HYDROXYPROLINE DEHYDROGENASE (PTHR13914:SF0)                                                                             | oxidase(PC00175)            | Mus musculus |
| MOUSE MGI=MGI=1349919 UniProtKB=O09111 | NDUBB | NADH dehydrogenase [ubiquinone] 1 beta subcomplex subunit 11, mitochondrial;Ndubf11;ortholog                          | NADH DEHYDROGENASE [UBIQUINONE] 1 BETA SUBCOMPLEX SUBUNIT 11, MITOCHONDRIAL (PTHR13327:SF1)                              | oxidoreductase(PC00176)     | Mus musculus |
| MOUSE MGI=MGI=2180167 UniProtKB=Q8K4Z3 | NNRE  | NAD(P)H-hydrate epimerase;Naxe;ortholog                                                                               | NAD(P)H-HYDRATE EPIMERASE (PTHR13232:SF11)                                                                               | epimerase/racemase(PC00096) | Mus musculus |
| MOUSE MGI=MGI=1891372 UniProtKB=Q924Y0 | BODG  | Gamma-butyrobetaine dioxygenase;Bbox1;ortholog                                                                        | GAMMA-BUTYROBETAINE DIOXYGENASE (PTHR10696:SF33)                                                                         | hydroxylase(PC00122)        | Mus musculus |
| MOUSE MGI=MGI=88137 UniProtKB=Q6P3A8   | ODBB  | 2-oxoisovalerate dehydrogenase subunit beta, mitochondrial;Bckdhhb;ortholog                                           | 2-OXOISOVALERATE DEHYDROGENASE SUBUNIT BETA, MITOCHONDRIAL (PTHR42980:SF1)                                               | dehydrogenase(PC00092)      | Mus musculus |
| MOUSE MGI=MGI=87921 UniProtKB=P00329   | ADH1  | Alcohol dehydrogenase 1;Adh1;ortholog                                                                                 | ALCOHOL DEHYDROGENASE 1C (PTHR43880:SF1)                                                                                 | dehydrogenase(PC00092)      | Mus musculus |
| MOUSE MGI=MGI=87870 UniProtKB=Q8QZT1   | THIL  | Acetyl-CoA acetyltransferase, mitochondrial;Acat1;ortholog                                                            | ACETYL-COA ACETYLTRANSFERASE, MITOCHONDRIAL (PTHR18919:SF156)                                                            | acyltransferase(PC00042)    | Mus musculus |
| MOUSE MGI=MGI=2183102 UniProtKB=Q99LB7 | SARDH | Sarcosine dehydrogenase, mitochondrial;Sardh;ortholog                                                                 | SARCOSINE DEHYDROGENASE, MITOCHONDRIAL (PTHR13847:SF200)                                                                 | dehydrogenase(PC00092)      | Mus musculus |
| MOUSE MGI=MGI=2180098 UniProtKB=Q9DBE0 | CSAD  | Cysteine sulfinic acid decarboxylase;Csad;ortholog                                                                    | CYSTEINE SULFINIC ACID DECARBOXYLASE (PTHR45677:SF7)                                                                     | decarboxylase(PC00089)      | Mus musculus |
| MOUSE MGI=MGI=97501 UniProtKB=Q9Z2V4   | PCKGC | Phosphoenolpyruvate carboxykinase, cytosolic [GTP];Pck1;ortholog                                                      | PHOSPHOENOLPYRUVATE CARBOXYKINASE, CYTOSOLIC [GTP] (PTHR11561:SF1)                                                       | kinase(PC00137)             | Mus musculus |
| MOUSE MGI=MGI=102797 UniProtKB=P41216  | ACSL1 | Long-chain-fatty-acid-CoA ligase 1;Acs1;ortholog                                                                      | LONG-CHAIN-FATTY-ACID-COA LIGASE 1 (PTHR43272:SF28)                                                                      | ligase(PC00142)             | Mus musculus |
| MOUSE MGI=MGI=1915886 UniProtKB=Q8R0F8 | FAHD1 | Acylpyruvase FAHD1, mitochondrial;Fahd1;ortholog                                                                      | ACYLPYRUVASE FAHD1, MITOCHONDRIAL (PTHR11820:SF7)                                                                        | hydrolase(PC00121)          | Mus musculus |
| MOUSE MGI=MGI=1934852 UniProtKB=Q9QXD1 | ACOX2 | Peroxisomal acyl-coenzyme A oxidase 2;Acox2;ortholog                                                                  | PEROXISOMAL ACYL-COENZYME A OXIDASE 2 (PTHR10909:SF344)                                                                  | oxidoreductase(PC00176)     | Mus musculus |
| MOUSE MGI=MGI=1913402 UniProtKB=Q8R111 | QCR9  | Cytochrome b-c1 complex subunit 9;Uqcr10;ortholog                                                                     | CYTOCHROME B-C1 COMPLEX SUBUNIT 9 (PTHR12980:SF0)                                                                        | reductase(PC00198)          | Mus musculus |
| MOUSE MGI=MGI=87871 UniProtKB=Q8CAY6   | THIC  | Acetyl-CoA acetyltransferase, cytosolic;Acat2;ortholog                                                                | ACETYL-COA ACETYLTRANSFERASE, CYTOSOLIC (PTHR18919:SF81)                                                                 | acyltransferase(PC00042)    | Mus musculus |
| MOUSE MGI=MGI=1923236 UniProtKB=A2AS89 | SPEB  | Agmatinase, mitochondrial;Agmat;ortholog                                                                              | AGMATINASE, MITOCHONDRIAL (PTHR11358:SF26)                                                                               | hydrolase(PC00121)          | Mus musculus |
| MOUSE MGI=MGI=2388287 UniProtKB=Q8VCW8 | ACSF2 | Acyl-CoA synthetase family member 2, mitochondrial;Acsf2;ortholog                                                     | ACYL-COA SYNTHETASE FAMILY MEMBER 2, MITOCHONDRIAL (PTHR43201:SF9)                                                       | ligase(PC00142)             | Mus musculus |
| MOUSE MGI=MGI=95530 UniProtKB=P97807   | FUMH  | Fumarate hydratase, mitochondrial;Fh;ortholog                                                                         | FUMARATE HYDRATASE, MITOCHONDRIAL (PTHR11444:SF1)                                                                        | lyase(PC00144)              | Mus musculus |
| MOUSE MGI=MGI=2385311 UniProtKB=Q8BMF4 | ODP2  | Dihydrolipoilysine-residue acetyltransferase component of pyruvate dehydrogenase complex, mitochondrial;Dlat;ortholog | DIHYDROLIPOYLLYSINE-RESIDUE ACETYLTRANSFERASE COMPONENT OF PYRUVATE DEHYDROGENASE COMPLEX, MITOCHONDRIAL (PTHR23151:SF9) | acetyltransferase(PC00038)  | Mus musculus |
| MOUSE MGI=MGI=2442420 UniProtKB=Q8K157 | GALM  | Aldose 1-epimerase;Galm;ortholog                                                                                      | ALDOSE 1-EPIMERASE (PTHR10091:SF0)                                                                                       | epimerase/racemase(PC00096) | Mus musculus |

|                                        |       |                                                                                             |                                                                                              |                                           |              |
|----------------------------------------|-------|---------------------------------------------------------------------------------------------|----------------------------------------------------------------------------------------------|-------------------------------------------|--------------|
| MOUSE MGI=MGI=1929955 UniProtKB=Q9JII6 | AK1A1 | Aldo-keto reductase family 1 member A1;Akr1a1;ortholog                                      | ALDO-KETO REDUCTASE FAMILY 1 MEMBER A1 (PTHR11732:SF462)                                     | reductase(PC00198)                        | Mus musculus |
| MOUSE MGI=MGI=96213 UniProtKB=P49429   | HPPD  | 4-hydroxyphenylpyruvate dioxygenase;Hpd;ortholog                                            | 4-HYDROXYPHENYLPIRUVATE DIOXYGENASE (PTHR11959:SF12)                                         | oxygenase(PC00177)                        | Mus musculus |
| MOUSE MGI=MGI=1096353 UniProtKB=P97328 | KHK   | Ketohexokinase;Khk;ortholog                                                                 | KETOHEXOKINASE (PTHR43085:SF1)                                                               | carbohydrate kinase(PC00065)              | Mus musculus |
| MOUSE MGI=MGI=1919161 UniProtKB=Q80XN0 | BDH   | D-beta-hydroxybutyrate dehydrogenase, mitochondrial;Bdh1;ortholog                           | D-BETA-HYDROXYBUTYRATE DEHYDROGENASE, MITOCHONDRIAL (PTHR43313:SF25)                         | dehydrogenase(PC00092)                    | Mus musculus |
| MOUSE MGI=MGI=1921379 UniProtKB=Q9DBT9 | M2GD  | Dimethylglycine dehydrogenase, mitochondrial;Dmgdh;ortholog                                 | DIMETHYLGLYCINE DEHYDROGENASE, MITOCHONDRIAL (PTHR13847:SF187)                               | dehydrogenase(PC00092)                    | Mus musculus |
| MOUSE MGI=MGI=1339962 UniProtKB=Q91XD4 | FTCD  | Formimidoyltransferase-cyclodeaminase;Ftcd;ortholog                                         | FORMIMIDOYLTRANSFERASE-CYCLODEAMINASE (PTHR12234:SF0)                                        | deaminase(PC00088);transferase(PC00220)   | Mus musculus |
| MOUSE MGI=MGI=97836 UniProtKB=Q8BVL4   | DHPR  | Dihydropteridine reductase;Qdpr;ortholog                                                    | DIHYDROPTERIDINE REDUCTASE (PTHR15104:SF0)                                                   | reductase(PC00198)                        | Mus musculus |
| MOUSE MGI=MGI=1914166 UniProtKB=Q9CR61 | NDUB7 | NADH dehydrogenase [ubiquinone] 1 beta subcomplex subunit 7;Ndufb7;ortholog                 | NADH DEHYDROGENASE [UBIQUINONE] 1 BETA SUBCOMPLEX SUBUNIT 7 (PTHR20900:SF0)                  | dehydrogenase(PC00092)                    | Mus musculus |
| MOUSE MGI=MGI=1922026 UniProtKB=Q91VM9 | IPYR2 | Inorganic pyrophosphatase 2, mitochondrial;Ppa2;ortholog                                    | INORGANIC PYROPHOSPHATASE 2, MITOCHONDRIAL (PTHR10286:SF49)                                  | pyrophosphatase(PC00196)                  | Mus musculus |
| MOUSE MGI=MGI=95911 UniProtKB=P50171   | DHB8  | Estradiol 17-beta-dehydrogenase 8;Hsd17b8;ortholog                                          | ESTRADIOL 17-BETA-DEHYDROGENASE 8 (PTHR42760:SF83)                                           | oxidoreductase(PC00176)                   | Mus musculus |
| MOUSE MGI=MGI=98266 UniProtKB=Q64442   | DHSO  | Sorbitol dehydrogenase;Sord;ortholog                                                        | SORBITOL DEHYDROGENASE (PTHR43161:SF9)                                                       | dehydrogenase(PC00092)                    | Mus musculus |
| MOUSE MGI=MGI=109176 UniProtKB=P52825  | CPT2  | Carnitine O-palmitoyltransferase 2, mitochondrial;Cpt2;ortholog                             | CARNITINE O-PALMITOYLTRANSFERASE 2, MITOCHONDRIAL (PTHR22589:SF51)                           | acyltransferase(PC00042)                  | Mus musculus |
| MOUSE MGI=MGI=107450 UniProtKB=O08749  | DLDH  | Dihydrolipoil dehydrogenase, mitochondrial;Dld;ortholog                                     | DIHYDROLIPOYL DEHYDROGENASE, MITOCHONDRIAL (PTHR22912:SF151)                                 | oxidoreductase(PC00176)                   | Mus musculus |
| MOUSE MGI=MGI=2148491 UniProtKB=Q921H8 | THIKA | 3-ketoacyl-CoA thiolase A, peroxisomal;Acaa1a;ortholog                                      | 3-KETOACYL-COA THIOLEASE A, PEROXISOMAL (PTHR43853:SF19)                                     | acetyltransferase(PC00038)                | Mus musculus |
| MOUSE MGI=MGI=107372 UniProtKB=Q60866  | PTER  | Phosphotriesterase-related protein;Pter;ortholog                                            | PHOSPHOTRIESTERASE-RELATED PROTEIN (PTHR10819:SF3)                                           | hydrolase(PC00121)                        | Mus musculus |
| MOUSE MGI=MGI=109279 UniProtKB=Q61941  | NNTM  | NAD(P) transhydrogenase, mitochondrial;Nnt;ortholog                                         | NAD(P) TRANSHYDROGENASE, MITOCHONDRIAL (PTHR10160:SF22)                                      | dehydrogenase(PC00092)                    | Mus musculus |
| MOUSE MGI=MGI=1920296 UniProtKB=Q80Y14 | GLRX5 | Glutaredoxin-related protein 5, mitochondrial;Glrx5;ortholog                                | GLUTAREDOXIN-RELATED PROTEIN 5, MITOCHONDRIAL (PTHR10293:SF16)                               | reductase(PC00198)                        | Mus musculus |
| MOUSE MGI=MGI=94873 UniProtKB=P61458   | PHS   | Pterin-4-alpha-carbinolamine dehydratase;Pcbd1;ortholog                                     | PTERIN-4-ALPHA-CARBINOLAMINE DEHYDRATASE (PTHR12599:SF13)                                    | dehydratase(PC00091)                      | Mus musculus |
| MOUSE MGI=MGI=98731 UniProtKB=P21981   | TGM2  | Protein-glutamine gamma-glutamyltransferase 2;Tgm2;ortholog                                 | PROTEIN-GLUTAMINE GAMMA-GLUTAMYLTRANSFERASE 2 (PTHR11590:SF6)                                | transferase(PC00220)                      | Mus musculus |
| MOUSE MGI=MGI=2178759 UniProtKB=Q924D0 | RT4I1 | Reticulon-4-interacting protein 1, mitochondrial;Rtn4ip1;ortholog                           | RETICULON-4-INTERACTING PROTEIN 1, MITOCHONDRIAL (PTHR11695:SF294)                           | dehydrogenase(PC00092)                    | Mus musculus |
| MOUSE MGI=MGI=1913358 UniProtKB=Q9DC69 | NDUA9 | NADH dehydrogenase [ubiquinone] 1 alpha subcomplex subunit 9, mitochondrial;Ndufa9;ortholog | NADH DEHYDROGENASE [UBIQUINONE] 1 ALPHA SUBCOMPLEX SUBUNIT 9, MITOCHONDRIAL (PTHR12126:SF11) | dehydrogenase(PC00092);reductase(PC00198) | Mus musculus |
| MOUSE MGI=MGI=2441982 UniProtKB=Q8BWF0 | SSDH  | Succinate-semialdehyde dehydrogenase, mitochondrial;Aldh5a1;ortholog                        | SUCCINATE-SEMIALDEHYDE DEHYDROGENASE, MITOCHONDRIAL (PTHR43353:SF5)                          | dehydrogenase(PC00092)                    | Mus musculus |
| MOUSE MGI=MGI=1349419 UniProtKB=Q9Z0X1 | AIFM1 | Apoptosis-inducing factor 1, mitochondrial;Aifm1;ortholog                                   | APOPTOSIS-INDUCING FACTOR 1, MITOCHONDRIAL (PTHR43557:SF4)                                   | oxidoreductase(PC00176)                   | Mus musculus |
| MOUSE MGI=MGI=103099 UniProtKB=P43024  | CX6A1 | Cytochrome c oxidase subunit 6A1, mitochondrial;Cox6a1;ortholog                             | CYTOCHROME C OXIDASE SUBUNIT 6A1, MITOCHONDRIAL (PTHR11504:SF4)                              | oxidase(PC00175)                          | Mus musculus |

|                                         |        |                                                                                                                         |                                                                                                                            |                            |              |
|-----------------------------------------|--------|-------------------------------------------------------------------------------------------------------------------------|----------------------------------------------------------------------------------------------------------------------------|----------------------------|--------------|
| MOUSE MGI=MGI=105386 UniProtKB=P53395   | ODB2   | Lipoamide acyltransferase component of branched-chain alpha-keto acid dehydrogenase complex, mitochondrial;Dbt;ortholog | LIPOAMIDE ACYLTRANSFERASE COMPONENT OF BRANCHED-CHAIN ALPHA-KETO ACID DEHYDROGENASE COMPLEX, MITOCHONDRIAL (PTHR43178:SF5) | acetyltransferase(PC00038) | Mus musculus |
| MOUSE MGI=MGI=1918974 UniProtKB=G3X982  | AOXC   | Aldehyde oxidase 3;Aox3;ortholog                                                                                        | ALDEHYDE OXIDASE 3 (PTHR11908:SF99)                                                                                        | oxidoreductase(PC00176)    | Mus musculus |
| MOUSE MGI=MGI=87880 UniProtKB=Q99K10    | ACON   | Aconitate hydratase, mitochondrial;Aco2;ortholog                                                                        | ACONITATE HYDRATASE, MITOCHONDRIAL (PTHR43160:SF3)                                                                         | hydratase(PC00120)         | Mus musculus |
| MOUSE MGI=MGI=2140356 UniProtKB=Q8CFX1  | G6PE   | GDH/6PGL endoplasmic bifunctional protein;H6pd;ortholog                                                                 | GDH/6PGL ENDOPLASMIC BIFUNCTIONAL PROTEIN (PTHR23429:SF7)                                                                  | dehydrogenase(PC00092)     | Mus musculus |
| MOUSE MGI=MGI=1339968 UniProtKB=Q8VVCN5 | CGL    | Cystathionine gamma-lyase;Cth;ortholog                                                                                  | CYSTATHIONINE GAMMA-LYASE (PTHR11808:SF15)                                                                                 | lyase(PC00144)             | Mus musculus |
| MOUSE MGI=MGI=1922725 UniProtKB=Q8K010  | OPLA   | 5-oxoprolinase;Oplah;ortholog                                                                                           | 5-OXOPROLINASE (PTHR11365:SF2)                                                                                             | hydrolase(PC00121)         | Mus musculus |
| MOUSE MGI=MGI=1915592 UniProtKB=Q9DCS9  | NDUBA  | NADH dehydrogenase [ubiquinone] 1 beta subcomplex subunit 10;Ndubf10;ortholog                                           | NADH DEHYDROGENASE [UBIQUINONE] 1 BETA SUBCOMPLEX SUBUNIT 10 (PTHR13094:SF1)                                               | oxidoreductase(PC00176)    | Mus musculus |
| MOUSE MGI=MGI=87979 UniProtKB=Q9WUR9    | KAD4   | Adenylate kinase 4, mitochondrial;Ak4;ortholog                                                                          | ADENYLATE KINASE 4, MITOCHONDRIAL (PTHR23359:SF58)                                                                         | nucleotide kinase(PC00172) | Mus musculus |
| MOUSE MGI=MGI=1351661 UniProtKB=Q9JLI0  | Q9JLI0 | Aldo-keto reductase a;Akr1c12;ortholog                                                                                  | ALDO-KETO REDUCTASE A-RELATED (PTHR11732:SF286)                                                                            | reductase(PC00198)         | Mus musculus |
| MOUSE MGI=MGI=2148202 UniProtKB=Q8VCT4  | CES1D  | Carboxylesterase 1D;Ces1d;ortholog                                                                                      | LIVER CARBOXYLESTERASE 1-RELATED (PTHR11559:SF179)                                                                         | esterase(PC00097)          | Mus musculus |
| MOUSE MGI=MGI=107932 UniProtKB=P52503   | NDUS6  | NADH dehydrogenase [ubiquinone] iron-sulfur protein 6, mitochondrial;Ndufs6;ortholog                                    | NADH DEHYDROGENASE [UBIQUINONE] IRON-SULFUR PROTEIN 6, MITOCHONDRIAL (PTHR13156:SF0)                                       | oxidoreductase(PC00176)    | Mus musculus |
| MOUSE MGI=MGI=1914710 UniProtKB=Q9CQ62  | DECR   | 2,4-dienoyl-CoA reductase, mitochondrial;Decr1;ortholog                                                                 | 17-BETA-HYDROXYSTEROID DEHYDROGENASE 14-RELATED (PTHR43658:SF8)                                                            | oxidoreductase(PC00176)    | Mus musculus |
| MOUSE MGI=MGI=1098296 UniProtKB=P97742  | CPT1A  | Carnitine O-palmitoyltransferase 1, liver isoform;Cpt1a;ortholog                                                        | CARNITINE O-PALMITOYLTRANSFERASE 1, LIVER ISOFORM (PTHR22589:SF74)                                                         | acyltransferase(PC00042)   | Mus musculus |
| MOUSE MGI=MGI=891996 UniProtKB=Q8C196   | CPSM   | Carbamoyl-phosphate synthase [ammonia], mitochondrial;Cps1;ortholog                                                     | CARBAMOYL-PHOSPHATE SYNTHASE [AMMONIA], MITOCHONDRIAL (PTHR11405:SF38)                                                     | ligase(PC00142)            | Mus musculus |
| MOUSE MGI=MGI=98351 UniProtKB=P08228    | SODC   | Superoxide dismutase [Cu-Zn];Sod1;ortholog                                                                              | SUPEROXIDE DISMUTASE [CU-ZN] (PTHR10003:SF66)                                                                              | oxidoreductase(PC00176)    | Mus musculus |
| MOUSE MGI=MGI=2384785 UniProtKB=Q8VCX1  | AK1D1  | 3-oxo-5-beta-steroid 4-dehydrogenase;Akr1d1;ortholog                                                                    | 3-OXO-5-BETA-STEROID 4-DEHYDROGENASE (PTHR11732:SF211)                                                                     | reductase(PC00198)         | Mus musculus |
| MOUSE MGI=MGI=1914272 UniProtKB=Q8JZN5  | ACAD9  | Acyl-CoA dehydrogenase family member 9, mitochondrial;Acad9;ortholog                                                    | ACYL-COA DEHYDROGENASE FAMILY MEMBER 9, MITOCHONDRIAL (PTHR43884:SF9)                                                      | dehydrogenase(PC00092)     | Mus musculus |
| MOUSE MGI=MGI=1915008 UniProtKB=Q99PG0  | AAAD   | Arylacетamide deacetylase;Aadac;ortholog                                                                                | ARYLACETAMIDE DEACETYLASE (PTHR23024:SF222)                                                                                | deacetylase(PC00087)       | Mus musculus |
| MOUSE MGI=MGI=1926144 UniProtKB=Q9D2R0  | AACS   | Acetoacetyl-CoA synthetase;Aacs;ortholog                                                                                | ACETOACETYL-COA SYNTHETASE (PTHR42921:SF1)                                                                                 | ligase(PC00142)            | Mus musculus |
| MOUSE MGI=MGI=98299 UniProtKB=P50431    | GLYC   | Serine hydroxymethyltransferase, cytosolic;Shmt1;ortholog                                                               | SERINE HYDROXYMETHYLTRANSFERASE, CYTOSOLIC (PTHR11680:SF21)                                                                | methyltransferase(PC00155) | Mus musculus |
| MOUSE MGI=MGI=3646700 UniProtKB=Q8CFA2  | GCST   | Aminomethyltransferase, mitochondrial;Amt;ortholog                                                                      | AMINOMETHYLTRANSFERASE, MITOCHONDRIAL (PTHR43757:SF2)                                                                      | methyltransferase(PC00155) | Mus musculus |
| MOUSE MGI=MGI=88474 UniProtKB=P12787    | COX5A  | Cytochrome c oxidase subunit 5A, mitochondrial;Cox5a;ortholog                                                           | CYTOCHROME C OXIDASE SUBUNIT 5A, MITOCHONDRIAL (PTHR14200:SF11)                                                            | oxidase(PC00175)           | Mus musculus |
| MOUSE MGI=MGI=1915444 UniProtKB=Q9CQC7  | NDUB4  | NADH dehydrogenase [ubiquinone] 1 beta subcomplex subunit 4;Ndubf4;ortholog                                             | NADH DEHYDROGENASE [UBIQUINONE] 1 BETA SUBCOMPLEX SUBUNIT 4 (PTHR15469:SF0)                                                | reductase(PC00198)         | Mus musculus |

|                                            |            |                                                                                      |                                                                                      |                            |              |
|--------------------------------------------|------------|--------------------------------------------------------------------------------------|--------------------------------------------------------------------------------------|----------------------------|--------------|
| MOUSE MGI=MGI=1330812 UniProtKB=Q9R0H0     | ACOX1      | Peroxisomal acyl-coenzyme A oxidase 1;Acox1;ortholog                                 | PEROXISOMAL ACYL-COENZYME A OXIDASE 1 (PTHR10909:SF383)                              | oxidoreductase(PC00176)    | Mus musculus |
| MOUSE MGI=MGI=88529 UniProtKB=Q9CZU6       | CISY       | Citrate synthase, mitochondrial;Cs;ortholog                                          | CITRATE SYNTHASE, MITOCHONDRIAL (PTHR11739:SF8)                                      | transferase(PC00220)       | Mus musculus |
| MOUSE MGI=MGI=1923513 UniProtKB=Q9DCM2     | GSTK1      | Glutathione S-transferase kappa 1;Gstk1;ortholog                                     | GLUTATHIONE S-TRANSFERASE KAPPA 1 (PTHR42943:SF2)                                    | transferase(PC00220)       | Mus musculus |
| MOUSE MGI=MGI=104645 UniProtKB=Q61694      | 3BHS5      | NADPH-dependent 3-keto-steroid reductase Hsd3b5;Hsd3b5;ortholog                      | NADPH-DEPENDENT 3-KETO-STEROID REDUCTASE HSD3B4-RELATED (PTHR10366:SF297)            | dehydratase(PC00091)       | Mus musculus |
| MOUSE MGI=MGI=1858208 UniProtKB=O35459     | ECH1       | Delta(3,5)-Delta(2,4)-dienoyl-CoA isomerase, mitochondrial;Ech1;ortholog             | DELTA(3,5)-DELTA(2,4)-DIENOYL-COA ISOMERASE, MITOCHONDRIAL (PTHR43149:SF1)           | hydratase(PC00120)         | Mus musculus |
| MOUSE MGI=MGI=1889802 UniProtKB=Q99L13     | 3HIDH      | 3-hydroxyisobutyrate dehydrogenase, mitochondrial;Hibadh;ortholog                    | 3-HYDROXYISOBUTYRATE DEHYDROGENASE, MITOCHONDRIAL (PTHR22981:SF7)                    | dehydrogenase(PC00092)     | Mus musculus |
| MOUSE MGI=MGI=96853 UniProtKB=P10518       | HEM2       | Delta-aminolevulinic acid dehydratase;Alad;ortholog                                  | DELTA-AMINOLEVULINIC ACID DEHYDRATASE (PTHR11458:SF0)                                | dehydratase(PC00091)       | Mus musculus |
| MOUSE MGI=MGI=1289238 UniProtKB=Q3TLP5     | ECHD2      | Enoyl-CoA hydratase domain-containing protein 2, mitochondrial;Echdc2;ortholog       | ENOYL-COA HYDRATASE DOMAIN-CONTAINING PROTEIN 2, MITOCHONDRIAL (PTHR11941:SF44)      | lyase(PC00144)             | Mus musculus |
| MOUSE MGI=MGI=5804923 UniProtKB=A0A1B0GSH8 | A0A1B0GSH8 | Predicted gene 45808 (Fragment);Gm45808;ortholog                                     | TRANS-1,2-DIHYDROBENZENE-1,2-DIOL DEHYDROGENASE (PTHR22604:SF105)                    | dehydrogenase(PC00092)     | Mus musculus |
| MOUSE MGI=MGI=1860776 UniProtKB=Q8BJ64     | CHDH       | Choline dehydrogenase, mitochondrial;Chdh;ortholog                                   | CHOLINE DEHYDROGENASE, MITOCHONDRIAL (PTHR11552:SF147)                               | dehydrogenase(PC00092)     | Mus musculus |
| MOUSE MGI=MGI=108024 UniProtKB=Q64374      | RGN        | Regucalcin;Rgn;ortholog                                                              | REGUCALCIN (PTHR10907:SF54)                                                          | esterase(PC00097)          | Mus musculus |
| MOUSE MGI=MGI=1929468 UniProtKB=P97493     | THIOM      | Thioredoxin, mitochondrial;Txn2;ortholog                                             | THIOREDOXIN, MITOCHONDRIAL (PTHR43601:SF3)                                           | oxidoreductase(PC00176)    | Mus musculus |
| MOUSE MGI=MGI=2139667 UniProtKB=Q8CHR6     | DPYD       | Dihydropyrimidine dehydrogenase [NADP(+)];Dpyd;ortholog                              | DIHYDROPYRIMIDINE DEHYDROGENASE [NADP(+)] (PTHR43073:SF2)                            | dehydrogenase(PC00092)     | Mus musculus |
| MOUSE MGI=MGI=1918039 UniProtKB=Q9CXF0     | KYNU       | Kynureninase;Kynu;ortholog                                                           | KYNURENINASE (PTHR14084:SF0)                                                         | hydrolase(PC00121)         | Mus musculus |
| MOUSE MGI=MGI=1343135 UniProtKB=Q9CXZ1     | NDUS4      | NADH dehydrogenase [ubiquinone] iron-sulfur protein 4, mitochondrial;Ndufs4;ortholog | NADH DEHYDROGENASE [UBIQUINONE] IRON-SULFUR PROTEIN 4, MITOCHONDRIAL (PTHR12219:SF8) | oxidoreductase(PC00176)    | Mus musculus |
| MOUSE MGI=MGI=3845761 UniProtKB=Q76I26     | Q76I26     | Methyltransferase hypoxia-inducible domain-containing 1;Methig1;ortholog             | METHYLTRANSFERASE-LIKE PROTEIN 7A (PTHR42912:SF21)                                   | methyltransferase(PC00155) | Mus musculus |
| MOUSE MGI=MGI=88475 UniProtKB=P19536       | COX5B      | Cytochrome c oxidase subunit 5B, mitochondrial;Cox5b;ortholog                        | CYTOCHROME C OXIDASE SUBUNIT 5B, MITOCHONDRIAL (PTHR10122:SF0)                       | oxidase(PC00175)           | Mus musculus |
| MOUSE MGI=MGI=2385271 UniProtKB=Q923D2     | BLVRB      | Flavin reductase (NADPH);Blvrb;ortholog                                              | FLAVIN REDUCTASE (NADPH) (PTHR43355:SF2)                                             | reductase(PC00198)         | Mus musculus |
| MOUSE MGI=MGI=106092 UniProtKB=Q99LC5      | ETFAL      | Electron transfer flavoprotein subunit alpha, mitochondrial;Etfal;ortholog           | ELECTRON TRANSFER FLAVOPROTEIN SUBUNIT ALPHA, MITOCHONDRIAL (PTHR43153:SF1)          | oxidoreductase(PC00176)    | Mus musculus |
| MOUSE MGI=MGI=2179733 UniProtKB=Q99J99     | THTM       | 3-mercaptopyruvate sulfurtransferase;Mpst;ortholog                                   | 3-MERCAPTOPYRUVATE SULFURTRANSFERASE (PTHR11364:SF25)                                | transferase(PC00220)       | Mus musculus |
| MOUSE MGI=MGI=1341155 UniProtKB=Q91W43     | GCSF       | Glycine dehydrogenase (decarboxylating), mitochondrial;Gldc;ortholog                 | GLYCINE DEHYDROGENASE (DECARBOXYLATING), MITOCHONDRIAL (PTHR11773:SF1)               | dehydrogenase(PC00092)     | Mus musculus |
| MOUSE MGI=MGI=1915408 UniProtKB=Q9CY27     | TECR       | Very-long-chain enoyl-CoA reductase;Tecr;ortholog                                    | VERY-LONG-CHAIN ENOYL-COA REDUCTASE (PTHR10556:SF31)                                 | dehydrogenase(PC00092)     | Mus musculus |
| MOUSE MGI=MGI=1913677 UniProtKB=Q9CQX2     | CYB5B      | Cytochrome b5 type B;Cyb5b;ortholog                                                  | CYTOCHROME B5 TYPE B (PTHR19359:SF14)                                                | oxidoreductase(PC00176)    | Mus musculus |
| MOUSE MGI=MGI=101787 UniProtKB=P03888      | NU1M       | NADH-ubiquinone oxidoreductase chain 1;Mtn1;ortholog                                 | NADH-UBIQUINONE OXIDOREDUCTASE CHAIN 1 (PTHR11432:SF3)                               | dehydrogenase(PC00092)     | Mus musculus |

|                                        |       |                                                                                                                                   |                                                                                                                                  |                              |              |
|----------------------------------------|-------|-----------------------------------------------------------------------------------------------------------------------------------|----------------------------------------------------------------------------------------------------------------------------------|------------------------------|--------------|
| MOUSE MGI=MGI=94871 UniProtKB=P42125   | EC1I  | Enoyl-CoA delta isomerase 1, mitochondrial;Eci1;ortholog                                                                          | ENOYL-COA DELTA ISOMERASE 1, MITOCHONDRIAL (PTHR11941:SF45)                                                                      | lyase(PC00144)               | Mus musculus |
| MOUSE MGI=MGI=1919785 UniProtKB=Q9CZS1 | AL1B1 | Aldehyde dehydrogenase X, mitochondrial;Aldh1b1;ortholog                                                                          | ALDEHYDE DEHYDROGENASE X, MITOCHONDRIAL (PTHR11699:SF207)                                                                        | dehydrogenase(PC00092)       | Mus musculus |
| MOUSE MGI=MGI=2143539 UniProtKB=Q571F8 | GLSL  | Glutaminase liver isoform, mitochondrial;Gls2;ortholog                                                                            | GLUTAMINASE LIVER ISOFORM, MITOCHONDRIAL (PTHR12544:SF33)                                                                        | hydrolase(PC00121)           | Mus musculus |
| MOUSE MGI=MGI=1926170 UniProtKB=Q9D2G2 | ODO2  | Dihydropyridoxyllysine-residue succinyltransferase component of 2-oxoglutarate dehydrogenase complex, mitochondrial;Dlst;ortholog | DIHYDROPIYOULLYSINE-RESIDUE SUCCINYLTRANSFERASE COMPONENT OF 2-OXOGLUTARATE DEHYDROGENASE COMPLEX, MITOCHONDRIAL (PTHR43416:SF5) | transferase(PC00220)         | Mus musculus |
| MOUSE MGI=MGI=2148199 UniProtKB=Q99MZ7 | PECR  | Peroxisomal trans-2-enoyl-CoA reductase;Pecr;ortholog                                                                             | PEROXISOMAL TRANS-2-ENOYL-COA REDUCTASE (PTHR24317:SF7)                                                                          | reductase(PC00198)           | Mus musculus |
| MOUSE MGI=MGI=2142687 UniProtKB=Q91WU0 | CES1F | Carboxylesterase 1F;Ces1f;ortholog                                                                                                | CARBOXYLESTERASE 1F-RELATED (PTHR11559:SF181)                                                                                    | esterase(PC00097)            | Mus musculus |
| MOUSE MGI=MGI=2144151 UniProtKB=Q91XF0 | PNPO  | Pyridoxine-5'-phosphate oxidase;Pnpo;ortholog                                                                                     | PYRIDOXINE-5'-PHOSPHATE OXIDASE (PTHR10851:SF0)                                                                                  | oxidase(PC00175)             | Mus musculus |
| MOUSE MGI=MGI=1925288 UniProtKB=Q3ULD5 | MCCB  | Methylcrotonoyl-CoA carboxylase beta chain, mitochondrial;Mccc2;ortholog                                                          | METHYLCROTONOYL-COA CARBOXYLASE BETA CHAIN, MITOCHONDRIAL (PTHR22855:SF13)                                                       | ligase(PC00142)              | Mus musculus |
| MOUSE MGI=MGI=102963 UniProtKB=P40936  | INMT  | Indolethylamine N-methyltransferase;Inmt;ortholog                                                                                 | INDOLETHYLAMINE N-METHYLTRANSFERASE (PTHR10867:SF33)                                                                             | methyltransferase(PC00155)   | Mus musculus |
| MOUSE MGI=MGI=1344370 UniProtKB=Q9CQ54 | NDUC2 | NADH dehydrogenase [ubiquinone] 1 subunit C2;Ndufc2;ortholog                                                                      | NADH DEHYDROGENASE [UBIQUINONE] 1 SUBUNIT C2-RELATED (PTHR13099:SF0)                                                             | oxidoreductase(PC00176)      | Mus musculus |
| MOUSE MGI=MGI=1914434 UniProtKB=Q9ERS2 | NDUAD | NADH dehydrogenase [ubiquinone] 1 alpha subcomplex subunit 13;Ndufa13;ortholog                                                    | NADH DEHYDROGENASE [UBIQUINONE] 1 ALPHA SUBCOMPLEX SUBUNIT 13 (PTHR12966:SF0)                                                    | dehydrogenase(PC00092)       | Mus musculus |
| MOUSE MGI=MGI=1919129 UniProtKB=Q8JZR0 | ACSL5 | Long-chain-fatty-acid-CoA ligase 5;Acsl5;ortholog                                                                                 | LONG-CHAIN-FATTY-ACID-COA LIGASE 5 (PTHR43272:SF33)                                                                              | ligase(PC00142)              | Mus musculus |
| MOUSE MGI=MGI=1923792 UniProtKB=Q8QZS1 | HIBCH | 3-hydroxyisobutyryl-CoA hydrolase, mitochondrial;Hibch;ortholog                                                                   | 3-HYDROXYISOBUTYRYL-COA HYDROLASE, MITOCHONDRIAL (PTHR43176:SF3)                                                                 | hydrolase(PC00121)           | Mus musculus |
| MOUSE MGI=MGI=1919812 UniProtKB=Q9CZL5 | PHS2  | Pterin-4-alpha-carbinolamine dehydratase 2;Pcbd2;ortholog                                                                         | PTERIN-4-ALPHA-CARBINOLAMINE DEHYDRATASE 2 (PTHR12599:SF15)                                                                      | dehydratase(PC00091)         | Mus musculus |
| MOUSE MGI=MGI=1349472 UniProtKB=Q9QY9  | ADH4  | Alcohol dehydrogenase 4;Adh4;ortholog                                                                                             | ALCOHOL DEHYDROGENASE 4 (PTHR43880:SF14)                                                                                         | dehydrogenase(PC00092)       | Mus musculus |
| MOUSE MGI=MGI=106594 UniProtKB=Q64516  | GLPK  | Glycerol kinase;Gk;ortholog                                                                                                       | GLYCEROL KINASE (PTHR10196:SF56)                                                                                                 | carbohydrate kinase(PC00065) | Mus musculus |
| MOUSE MGI=MGI=1914682 UniProtKB=Q9DCU9 | HOGA1 | 4-hydroxy-2-oxoglutarate aldolase, mitochondrial;Hoga1;ortholog                                                                   | 4-HYDROXY-2-OXOGLUTARATE ALDOLASE, MITOCHONDRIAL (PTHR12128:SF15)                                                                | lyase(PC00144)               | Mus musculus |
| MOUSE MGI=MGI=1316706 UniProtKB=Q9Z1J3 | NFS1  | Cysteine desulfurase, mitochondrial;Nfs1;ortholog                                                                                 | CYSTEINE DESULFURASE, MITOCHONDRIAL (PTHR11601:SF34)                                                                             | lyase(PC00144)               | Mus musculus |
| MOUSE MGI=MGI=1914780 UniProtKB=Q9D855 | QCR7  | Cytochrome b-c1 complex subunit 7;Uqcrb;ortholog                                                                                  | CYTOCHROME B-C1 COMPLEX SUBUNIT 7 (PTHR12022:SF0)                                                                                | reductase(PC00198)           | Mus musculus |
| MOUSE MGI=MGI=1353450 UniProtKB=P24549 | AL1A1 | Retinal dehydrogenase 1;Aldh1a1;ortholog                                                                                          | RETINAL DEHYDROGENASE 1 (PTHR11699:SF140)                                                                                        | dehydrogenase(PC00092)       | Mus musculus |

Table S2. List of proteins down-regulated in Kupffer cells vs monocytes and belonged to PC00171 group of proteins (nucleic acid binding protein) according to PANTHER (<http://pantherdb.org/>).

| Gene ID                                | Mapped IDs | Gene Name, Gene symbol, ortholog   | PANTHER Family/Subfamily        | PANTHER Protein Class        | Species      |
|----------------------------------------|------------|------------------------------------|---------------------------------|------------------------------|--------------|
| MOUSE MGI=MGI=1916231 UniProtKB=P57784 | RU2A       | U2 small nuclear ribonucleoprotein | U2 SMALL NUCLEAR RIBONUCLEOPROT | RNA splicing factor(PC00148) | Mus musculus |

|                                        |       |                                                                                                 |                                                                                                 |                                       |              |
|----------------------------------------|-------|-------------------------------------------------------------------------------------------------|-------------------------------------------------------------------------------------------------|---------------------------------------|--------------|
|                                        |       | A;Snrpa1;ortholog                                                                               | EIN A'<br>(PTHR10552:SF6)                                                                       |                                       | s            |
| MOUSE MGI=MGI=1923772 UniProtKB=Q6ZWM4 | LSM8  | U6 snRNA-associated Sm-like protein<br>LSm8;Lsm8;ortholog                                       | U6 SNRNA-ASSOCIATED SM-LIKE PROTEIN LSM8<br>(PTHR15588:SF9)                                     | RNA splicing factor(PC00148)          | Mus musculus |
| MOUSE MGI=MGI=2679722 UniProtKB=Q9EPU4 | CPSF1 | Cleavage and polyadenylation specificity factor subunit<br>1;Cpsf1;ortholog                     | CLEAVAGE AND POLYADENYLATION SPECIFICITY FACTOR SUBUNIT 1<br>(PTHR10644:SF2)                    | RNA processing factor(PC00147)        | Mus musculus |
| MOUSE MGI=MGI=1926421 UniProtKB=Q8CGF7 | TCRG1 | Transcription elongation regulator<br>1;Tcerg1;ortholog                                         | TRANSCRIPTION ELONGATION REGULATOR 1<br>(PTHR15377:SF7)                                         | general transcription factor(PC00259) | Mus musculus |
| MOUSE MGI=MGI=99894 UniProtKB=P61979   | HNRPK | Heterogeneous nuclear ribonucleoprotein<br>K;Hnmpk;ortholog                                     | HETEROGENEOUS NUCLEAR RIBONUCLEOPROTEIN K<br>(PTHR10288:SF179)                                  | RNA binding protein(PC00031)          | Mus musculus |
| MOUSE MGI=MGI=1095403 UniProtKB=Q64213 | SF01  | Splicing factor<br>1;Sf1;ortholog                                                               | SPLICING FACTOR 1<br>(PTHR11208:SF45)                                                           | RNA splicing factor(PC00148)          | Mus musculus |
| MOUSE MGI=MGI=1913895 UniProtKB=Q8R326 | PSPC1 | Paraspeckle component<br>1;Pspc1;ortholog                                                       | PARASPECKLE COMPONENT 1<br>(PTHR23189:SF14)                                                     | RNA binding protein(PC00031)          | Mus musculus |
| MOUSE MGI=MGI=892003 UniProtKB=O08784  | TCOF  | Treacle protein;Tcof1;ortholog                                                                  | TREACLE PROTEIN<br>(PTHR20787:SF10)                                                             | RNA binding protein(PC00031)          | Mus musculus |
| MOUSE MGI=MGI=1914120 UniProtKB=Q9CY58 | PAIRB | Plasminogen activator inhibitor 1 RNA-binding protein;Serbp1;ortholog                           | PLASMINOGEN ACTIVATOR INHIBITOR 1 RNA-BINDING PROTEIN<br>(PTHR12299:SF29)                       | RNA binding protein(PC00031)          | Mus musculus |
| MOUSE MGI=MGI=1913670 UniProtKB=Q80UW8 | RPAB1 | DNA-directed RNA polymerases I, II, and III subunit<br>RPABC1;Polr2e;ortholog                   | DNA-DIRECTED RNA POLYMERASES I, II, AND III SUBUNIT<br>RPABC1<br>(PTHR10535:SF0)                | DNA-directed RNA polymerase(PC00019)  | Mus musculus |
| MOUSE MGI=MGI=1932339 UniProtKB=Q99NB9 | SF3B1 | Splicing factor 3B subunit<br>1;Sf3b1;ortholog                                                  | SPLICING FACTOR 3B SUBUNIT 1<br>(PTHR12097:SF0)                                                 | RNA splicing factor(PC00148)          | Mus musculus |
| MOUSE MGI=MGI=98345 UniProtKB=P62317   | SMD2  | Small nuclear ribonucleoprotein Sm D2;Snrpd2;ortholog                                           | SMALL NUCLEAR RIBONUCLEOPROTEIN SM D2<br>(PTHR12777:SF0)                                        | RNA processing factor(PC00147)        | Mus musculus |
| MOUSE MGI=MGI=1346087 UniProtKB=P14576 | SRP54 | Signal recognition particle 54 kDa protein;Srp54;ortholog                                       | SIGNAL RECOGNITION PARTICLE 54 KDA PROTEIN<br>(PTHR11564:SF5)                                   | RNA binding protein(PC00031)          | Mus musculus |
| MOUSE MGI=MGI=96160 UniProtKB=P17095   | HMG1  | High mobility group protein HMG-I/HMG-Y;Hmga1;ortholog                                          | HIGH MOBILITY GROUP PROTEIN HMG-I/HMG-Y<br>(PTHR23341:SF1)                                      | endodeoxyribonuclease(PC00093)        | Mus musculus |
| MOUSE MGI=MGI=2446249 UniProtKB=Q3UJY9 | EDC4  | Enhancer of mRNA-decapping protein<br>4;Edc4;ortholog                                           | ENHANCER OF MRNA-DECAPPING PROTEIN 4<br>(PTHR15598:SF5)                                         | mRNA capping factor(PC00145)          | Mus musculus |
| MOUSE MGI=MGI=104912 UniProtKB=Q62203  | SF3A2 | Splicing factor 3A subunit<br>2;Sf3a2;ortholog                                                  | SPLICING FACTOR 3A SUBUNIT 2<br>(PTHR23205:SF0)                                                 | RNA splicing factor(PC00148)          | Mus musculus |
| MOUSE MGI=MGI=1926232 UniProtKB=Q8BL97 | SRSF7 | Serine/arginine-rich splicing factor<br>7;Srsf7;ortholog                                        | SERINE/ARGININE-RICH SPLICING FACTOR 7<br>(PTHR23147:SF18)                                      | RNA splicing factor(PC00148)          | Mus musculus |
| MOUSE MGI=MGI=1931527 UniProtKB=P43274 | H14   | Histone H1.4;Hist1h1e;ortholog                                                                  | HISTONE H1.4<br>(PTHR11467:SF57)                                                                | histone(PC00118)                      | Mus musculus |
| MOUSE MGI=MGI=94912 UniProtKB=P13864   | DNMT1 | DNA (cytosine-5)-methyltransferase<br>1;Dnmt1;ortholog                                          | DNA (CYTOSINE-5)-METHYLTRANSFERASE 1<br>(PTHR10629:SF52)                                        | DNA methyltransferase(PC00013)        | Mus musculus |
| MOUSE MGI=MGI=99918 UniProtKB=Q9Z2D6   | MECP2 | Methyl-CpG-binding protein<br>2;MeCP2;ortholog                                                  | METHYL-CPG-BINDING DOMAIN PROTEIN 4-RELATED<br>(PTHR15074:SF0)                                  | DNA binding protein(PC00009)          | Mus musculus |
| MOUSE MGI=MGI=1919912 UniProtKB=Q9CSH3 | RRP44 | Exosome complex exonuclease<br>RRP44;Dis3;ortholog                                              | EXOSOME COMPLEX EXONUCLEASE<br>RRP44<br>(PTHR23355:SF35)                                        | exoribonuclease(PC00099)              | Mus musculus |
| MOUSE MGI=MGI=1923576 UniProtKB=Q92119 | EXOS4 | Exosome complex component<br>RRP41;Exosc4;ortholog                                              | EXOSOME COMPLEX COMPONENT RRP41<br>(PTHR11953:SF0)                                              | exoribonuclease(PC00099)              | Mus musculus |
| MOUSE MGI=MGI=2442402 UniProtKB=Q6ZQ08 | CNOT1 | CCR4-NOT transcription complex subunit<br>1;Cnot1;ortholog                                      | CCR4-NOT TRANSCRIPTION COMPLEX SUBUNIT 1<br>(PTHR13162:SF8)                                     | mRNA polyadenylation factor(PC00146)  | Mus musculus |
| MOUSE MGI=MGI=1858234 UniProtKB=Q60865 | CAPR1 | Caprin-1;Caprin1;ortholog                                                                       | CAPRIN-1<br>(PTHR22922:SF3)                                                                     | RNA binding protein(PC00031)          | Mus musculus |
| MOUSE MGI=MGI=893579 UniProtKB=Q60749  | KHDR1 | KH domain-containing, RNA-binding, signal transduction-associated protein<br>1;Khdrbs1;ortholog | KH DOMAIN-CONTAINING, RNA-BINDING, SIGNAL TRANSDUCTION-ASSOCIATED PROTEIN 1<br>(PTHR11208:SF30) | RNA splicing factor(PC00148)          | Mus musculus |
| MOUSE MGI=MGI=98283 UniProtKB=Q6PDM2   | SRSF1 | Serine/arginine-rich splicing factor                                                            | SERINE/ARGININE-RICH SPLICING                                                                   | RNA splicing factor(PC00148)          | Mus musculus |

|                                        |       |                                                              |                                                               |                                       |              |
|----------------------------------------|-------|--------------------------------------------------------------|---------------------------------------------------------------|---------------------------------------|--------------|
|                                        |       | 1;Srsf1;ortholog                                             | FACTOR 1 (PTHR23147:SF44)                                     |                                       | s            |
| MOUSE MGI=MGI=894687 UniProtKB=Q9D8R1  | XRN2  | 5'-3' exoribonuclease 2;Xrn2;ortholog                        | 5'-3' EXORIBONUCLEASE 2 (PTHR12341:SF41)                      | exoribonuclease(PC00099)              | Mus musculus |
| MOUSE MGI=MGI=103199 UniProtKB=P49717  | MCM4  | DNA replication licensing factor MCM4;Mcm4;ortholog          | DNA REPLICATION LICENSING FACTOR MCM4 (PTHR11630:SF66)        | DNA binding protein(PC00009)          | Mus musculus |
| MOUSE MGI=MGI=1196624 UniProtKB=P10711 | TCEA1 | Transcription elongation factor A protein 1;Tcea1;ortholog   | TRANSCRIPTION ELONGATION FACTOR A PROTEIN 1 (PTHR11477:SF1)   | general transcription factor(PC00259) | Mus musculus |
| MOUSE MGI=MGI=107252 UniProtKB=Q1HFZ0  | NSUN2 | tRNA (cytosine(34)-C(5))-methyltransferase;Nsun2;ortholog    | TRNA (CYTOSINE(34)-C(5))-METHYLTRANSFERASE (PTHR22808:SF20)   | RNA methyltransferase(PC00033)        | Mus musculus |
| MOUSE MGI=MGI=90676 UniProtKB=O35900   | LSM2  | U6 snRNA-associated Sm-like protein LSM2;Lsm2;ortholog       | U6 SNRNA-ASSOCIATED SM-LIKE PROTEIN LSM2 (PTHR13829:SF2)      | RNA splicing factor(PC00148)          | Mus musculus |
| MOUSE MGI=MGI=97960 UniProtKB=Q99M28   | RNPS1 | RNA-binding protein with serine-rich domain 1;Rnps1;ortholog | RNA-BINDING PROTEIN WITH SERINE-RICH DOMAIN 1 (PTHR15481:SF2) | RNA splicing factor(PC00148)          | Mus musculus |
| MOUSE MGI=MGI=1860086 UniProtKB=Q9Z2L7 | CRLF3 | Cytokine receptor-like factor 3;Crlf3;ortholog               | CYTOKINE RECEPTOR-LIKE FACTOR 3 (PTHR23389:SF12)              | DNA binding protein(PC00009)          | Mus musculus |
| MOUSE MGI=MGI=1917128 UniProtKB=P62307 | RUXF  | Small nuclear ribonucleoprotein F;Snrpf;ortholog             | SMALL NUCLEAR RIBONUCLEOPROTEIN F (PTHR11021:SF0)             | RNA splicing factor(PC00148)          | Mus musculus |
| MOUSE MGI=MGI=1925901 UniProtKB=P62313 | LSM6  | U6 snRNA-associated Sm-like protein LSM6;Lsm6;ortholog       | U6 SNRNA-ASSOCIATED SM-LIKE PROTEIN LSM6 (PTHR11021:SF1)      | RNA splicing factor(PC00148)          | Mus musculus |
| MOUSE MGI=MGI=1915261 UniProtKB=P62309 | RUXG  | Small nuclear ribonucleoprotein G;Snrpg;ortholog             | SMALL NUCLEAR RIBONUCLEOPROTEIN G-RELATED (PTHR10553:SF26)    | RNA splicing factor(PC00148)          | Mus musculus |
| MOUSE MGI=MGI=1919016 UniProtKB=Q9CW46 | RAVR1 | Ribonucleoprotein PTB-binding 1;Raver1;ortholog              | RIBONUCLEOPROTEIN PTB-BINDING 1 (PTHR23189:SF46)              | RNA binding protein(PC00031)          | Mus musculus |
| MOUSE MGI=MGI=105380 UniProtKB=P97310  | MCM2  | DNA replication licensing factor MCM2;Mcm2;ortholog          | DNA REPLICATION LICENSING FACTOR MCM2 (PTHR11630:SF44)        | DNA binding protein(PC00009)          | Mus musculus |
| MOUSE MGI=MGI=102779 UniProtKB=P39749  | FEN1  | Flap endonuclease 1;Fen1;ortholog                            | FLAP ENDONUCLEASE 1 (PTHR11081:SF9)                           | exodeoxyribonuclease(PC00098)         | Mus musculus |
| MOUSE MGI=MGI=1930948 UniProtKB=Q9CY66 | GAR1  | H/ACA ribonucleoprotein complex subunit 1;Gar1;ortholog      | H/ACA RIBONUCLEOPROTEIN COMPLEX SUBUNIT 1 (PTHR23237:SF6)     | RNA binding protein(PC00031)          | Mus musculus |
| MOUSE MGI=MGI=1922946 UniProtKB=Q91YR7 | PRP6  | Pre-mRNA-processing factor 6;Prpf6;ortholog                  | PRE-MRNA-PROCESSING FACTOR 6 (PTHR11246:SF1)                  | RNA splicing factor(PC00148)          | Mus musculus |
| MOUSE MGI=MGI=893597 UniProtKB=P97376  | FRG1  | Protein FRG1;Frg1;ortholog                                   | PROTEIN FRG1 (PTHR12928:SF3)                                  | RNA splicing factor(PC00148)          | Mus musculus |
| MOUSE MGI=MGI=1298398 UniProtKB=Q61881 | MCM7  | DNA replication licensing factor MCM7;Mcm7;ortholog          | DNA REPLICATION LICENSING FACTOR MCM7 (PTHR11630:SF26)        | DNA binding protein(PC00009)          | Mus musculus |
| MOUSE MGI=MGI=1890165 UniProtKB=Q6ZQ58 | LARP1 | La-related protein 1;Larp1;ortholog                          | LA-RELATED PROTEIN 1 (PTHR22792:SF51)                         | RNA binding protein(PC00031)          | Mus musculus |
| MOUSE MGI=MGI=1921076 UniProtKB=Q8BG81 | PDIP3 | Polymerase delta-interacting protein 3;Poldip3;ortholog      | POLYMERASE DELTA-INTERACTING PROTEIN 3 (PTHR19965:SF71)       | RNA binding protein(PC00031)          | Mus musculus |
| MOUSE MGI=MGI=107169 UniProtKB=P16254  | SRP14 | Signal recognition particle 14 kDa protein;Srp14;ortholog    | SIGNAL RECOGNITION PARTICLE 14 KDA PROTEIN (PTHR12013:SF0)    | RNA binding protein(PC00031)          | Mus musculus |
| MOUSE MGI=MGI=1891690 UniProtKB=Q7TMK9 | HNRPQ | Heterogeneous nuclear ribonucleoprotein Q;Syncrip;ortholog   | HETEROGENEOUS NUCLEAR RIBONUCLEOPROTEIN Q (PTHR21245:SF11)    | RNA binding protein(PC00031)          | Mus musculus |
| MOUSE MGI=MGI=2136773 UniProtKB=Q8C5N3 | CWC22 | Pre-mRNA-splicing factor CWC22 homolog;Cwc22;ortholog        | PRE-MRNA-SPLICING FACTOR CWC22 HOMOLOG (PTHR18034:SF3)        | RNA processing factor(PC00147)        | Mus musculus |
| MOUSE MGI=MGI=1913961 UniProtKB=P70122 | SBDS  | Ribosome maturation protein SBDS;Sbds;ortholog               | RIBOSOME MATURATION PROTEIN SBDS (PTHR10927:SF1)              | RNA binding protein(PC00031)          | Mus musculus |
| MOUSE MGI=MGI=2388280 UniProtKB=Q8CF17 | RPB2  | DNA-directed RNA polymerase II subunit RPB2;Polr2b;ortholog  | DNA-DIRECTED RNA POLYMERASE II SUBUNIT RPB2 (PTHR20856:SF7)   | DNA-directed RNA polymerase(PC00019)  | Mus musculus |
| MOUSE MGI=MGI=1915208 UniProtKB=Q6NV83 | SR140 | U2 snRNP-associated SURP motif-containing                    | U2 SNRNP-ASSOCIATED SURP MOTIF-CONTAINING                     | RNA processing factor(PC00147)        | Mus musculus |



|                                        |       |                                                                                                                |                                                                                                                 |                                       |          |
|----------------------------------------|-------|----------------------------------------------------------------------------------------------------------------|-----------------------------------------------------------------------------------------------------------------|---------------------------------------|----------|
|                                        |       | protein;U2surp;ortholog                                                                                        | PROTEIN (PTHR23140:SF0)                                                                                         |                                       |          |
| MOUSE MGI=MGI=1196294 UniProtKB=Q91WJ8 | FUBP1 | Far upstream element-binding protein 1;Fubp1;ortholog                                                          | FAR UPSTREAM ELEMENT-BINDING PROTEIN 1 (PTHR10288:SF99)                                                         | RNA binding protein(PC00031)          | Musculus |
| MOUSE MGI=MGI=1914384 UniProtKB=Q9D6Z1 | NOP56 | Nucleolar protein 56;Nop56;ortholog                                                                            | NUCLEOLAR PROTEIN 56 (PTHR10894:SF0)                                                                            | RNA binding protein(PC00031)          | Musculus |
| MOUSE MGI=MGI=1915469 UniProtKB=Q9CQF3 | CPSF5 | Cleavage and polyadenylation specificity factor subunit 5;Nudt21;ortholog                                      | CLEAVAGE AND POLYADENYLATION SPECIFICITY FACTOR SUBUNIT 5 (PTHR13047:SF0)                                       | RNA splicing factor(PC00148)          | Musculus |
| MOUSE MGI=MGI=1339973 UniProtKB=Q9Z1X4 | ILF3  | Interleukin enhancer-binding factor 3;Ilf3;ortholog                                                            | INTERLEUKIN ENHANCER-BINDING FACTOR 3 (PTHR45762:SF4)                                                           | RNA binding protein(PC00031)          | Musculus |
| MOUSE MGI=MGI=1201779 UniProtKB=P70333 | HNRH2 | Heterogeneous nuclear ribonucleoprotein H2;Hnrnp2;ortholog                                                     | HETEROGENEOUS NUCLEAR RIBONUCLEOPROTEIN H2 (PTHR13976:SF33)                                                     | RNA splicing factor(PC00148)          | Musculus |
| MOUSE MGI=MGI=1928482 UniProtKB=Q9JKP5 | MBNL1 | Muscleblind-like protein 1;Mbnl1;ortholog                                                                      | MUSCLEBLIND-LIKE PROTEIN 1 (PTHR12675:SF7)                                                                      | RNA splicing factor(PC00148)          | Musculus |
| MOUSE MGI=MGI=88431 UniProtKB=P53996   | CNBP  | Cellular nucleic acid-binding protein;Cnbp;ortholog                                                            | CELLULAR NUCLEIC ACID-BINDING PROTEIN (PTHR23002:SF67)                                                          | nucleic acid binding protein(PC00171) | Musculus |
| MOUSE MGI=MGI=1341044 UniProtKB=O08583 | THOC4 | THO complex subunit 4;Alyref;ortholog                                                                          | THO COMPLEX SUBUNIT 4 (PTHR19965:SF35)                                                                          | RNA binding protein(PC00031)          | Musculus |
| MOUSE MGI=MGI=1913806 UniProtKB=Q9D6N5 | NC2A  | Dr1-associated corepressor;Drap1;ortholog                                                                      | DR1-ASSOCIATED COREPRESSOR (PTHR10252:SF5)                                                                      | DNA binding protein(PC00009)          | Musculus |
| MOUSE MGI=MGI=1929092 UniProtKB=Q8C2Q3 | RBM14 | RNA-binding protein 14;Rbm14;ortholog                                                                          | RNA-BINDING PROTEIN 14 (PTHR23147:SF53)                                                                         | RNA splicing factor(PC00148)          | Musculus |
| MOUSE MGI=MGI=1935129 UniProtKB=Q91ZW3 | SMCA5 | SWI/SNF-related matrix-associated actin-dependent regulator of chromatin subfamily A member 5;Smarca5;ortholog | SWI/SNF-RELATED MATRIX-ASSOCIATED ACTIN-DEPENDENT REGULATOR OF CHROMATIN SUBFAMILY A MEMBER 5 (PTHR10799:SF879) | DNA helicase(PC00011)                 | Musculus |
| MOUSE MGI=MGI=1289341 UniProtKB=Q921M3 | SF3B3 | Splicing factor 3B subunit 3;Sf3b3;ortholog                                                                    | SPLICING FACTOR 3B SUBUNIT 3 (PTHR10644:SF1)                                                                    | RNA processing factor(PC00147)        | Musculus |
| MOUSE MGI=MGI=1919794 UniProtKB=Q8BTW3 | EXOS6 | Exosome complex component MTR3;Exosc6;ortholog                                                                 | EXOSOME COMPLEX COMPONENT MTR3 (PTHR11953:SF2)                                                                  | exoribonuclease(PC00099)              | Musculus |
| MOUSE MGI=MGI=1917829 UniProtKB=Q6NZF1 | ZC11A | Zinc finger CCH domain-containing protein 11A;Zc3h11a;ortholog                                                 | ZINC FINGER CCH DOMAIN-CONTAINING PROTEIN 11A (PTHR15725:SF2)                                                   | RNA processing factor(PC00147)        | Musculus |
| MOUSE MGI=MGI=98284 UniProtKB=Q62093   | SRSF2 | Serine/arginine-rich splicing factor 2;Srsf2;ortholog                                                          | SERINE/ARGININE-RICH SPLICING FACTOR 2 (PTHR23147:SF119)                                                        | RNA splicing factor(PC00148)          | Musculus |
| MOUSE MGI=MGI=1891840 UniProtKB=Q3UYV9 | NCBP1 | Nuclear cap-binding protein subunit 1;Ncbp1;ortholog                                                           | NUCLEAR CAP-BINDING PROTEIN SUBUNIT 1 (PTHR12412:SF2)                                                           | RNA splicing factor(PC00148)          | Musculus |
| MOUSE MGI=MGI=1340045 UniProtKB=Q9JMD0 | ZN207 | BUB3-interacting and GLEBS motif-containing protein ZNF207;Znf207;ortholog                                     | BUB3-INTERACTING AND GLEBS MOTIF-CONTAINING PROTEIN ZNF207 (PTHR23215:SF0)                                      | DNA binding protein(PC00009)          | Musculus |
| MOUSE MGI=MGI=1099786 UniProtKB=O35286 | DHX15 | Pre-mRNA-splicing factor ATP-dependent RNA helicase DHX15;Dhx15;ortholog                                       | PRE-MRNA-SPLICING FACTOR ATP-DEPENDENT RNA HELICASE DHX15 (PTHR18934:SF95)                                      | RNA helicase(PC00032)                 | Musculus |
| MOUSE MGI=MGI=98341 UniProtKB=Q62376   | RU17  | U1 small nuclear ribonucleoprotein 70 kDa;Snrnp70;ortholog                                                     | U1 SMALL NUCLEAR RIBONUCLEOPROTEIN 70 KDA (PTHR13952:SF5)                                                       | RNA splicing factor(PC00148)          | Musculus |
| MOUSE MGI=MGI=88192 UniProtKB=Q3TKT4   | SMCA4 | Transcription activator BRG1;Smarca4;ortholog                                                                  | TRANSCRIPTION ACTIVATOR BRG1 (PTHR10799:SF76)                                                                   | DNA helicase(PC00011)                 | Musculus |
| MOUSE MGI=MGI=1343463 UniProtKB=Q9WVA3 | BUB3  | Mitotic checkpoint protein BUB3;Bub3;ortholog                                                                  | MITOTIC CHECKPOINT PROTEIN BUB3 (PTHR10971:SF5)                                                                 | RNA binding protein(PC00031)          | Musculus |
| MOUSE MGI=MGI=1858230 UniProtKB=Q9JLI8 | SART3 | Squamous cell carcinoma antigen recognized by T-cells 3;Sart3;ortholog                                         | SQUAMOUS CELL CARCINOMA ANTIGEN RECOGNIZED BY T-CELLS 3 (PTHR15481:SF5)                                         | RNA splicing factor(PC00148)          | Musculus |
| MOUSE MGI=MGI=98344 UniProtKB=P62315   | SMD1  | Small nuclear ribonucleoprotein Sm D1;Snrpd1;ortholog                                                          | SMALL NUCLEAR RIBONUCLEOPROTEIN SM D1 (PTHR23338:SF18)                                                          | RNA splicing factor(PC00148)          | Musculus |
| MOUSE MGI=MGI=1298227 UniProtKB=P97311 | MCM6  | DNA replication licensing factor MCM6;Mcm6;ortholog                                                            | DNA REPLICATION LICENSING FACTOR MCM6                                                                           | DNA binding protein(PC00009)          | Musculus |

|                                        |        |                                                                     |                                                                               |                                             |          |
|----------------------------------------|--------|---------------------------------------------------------------------|-------------------------------------------------------------------------------|---------------------------------------------|----------|
|                                        |        |                                                                     | (PTHR11630:SF73)                                                              |                                             |          |
| MOUSE MGI=MGI=1913604 UniProtKB=Q9CSN1 | SNW1   | SNW domain-containing protein 1;Snw1;ortholog                       | SNW DOMAIN-CONTAINING PROTEIN 1 (PTHR12096:SF0)                               | RNA splicing factor(PC00148)                | Musculus |
| MOUSE MGI=MGI=98353 UniProtKB=Q9QX47   | SON    | Protein SON;Son;ortholog                                            | PROTEIN SON (PTHR46528:SF1)                                                   | RNA splicing factor(PC00148)                | Musculus |
| MOUSE MGI=MGI=103197 UniProtKB=P49718  | MCM5   | DNA replication licensing factor MCM5;Mcm5;ortholog                 | DNA REPLICATION LICENSING FACTOR MCM5 (PTHR11630:SF42)                        | DNA binding protein(PC00009)                | Musculus |
| MOUSE MGI=MGI=98884 UniProtKB=Q9D883   | U2AF1  | Splicing factor U2AF 35 kDa subunit;U2af1;ortholog                  | SPlicing FACTOR U2AF 35 KDA SUBUNIT-RELATED (PTHR12620:SF11)                  | RNA splicing factor(PC00148)                | Musculus |
| MOUSE MGI=MGI=101845 UniProtKB=P25206  | MCM3   | DNA replication licensing factor MCM3;Mcm3;ortholog                 | DNA REPLICATION LICENSING FACTOR MCM3 (PTHR11630:SF72)                        | DNA binding protein(PC00009)                | Musculus |
| MOUSE MGI=MGI=98287 UniProtKB=O35326   | SRSF5  | Serine/arginine-rich splicing factor 5;Srsf5;ortholog               | SERINE/ARGININE-RICH SPlicing FACTOR 5 (PTHR23147:SF68)                       | RNA splicing factor(PC00148)                | Musculus |
| MOUSE MGI=MGI=98788 UniProtKB=Q04750   | TOP1   | DNA topoisomerase 1;Top1;ortholog                                   | DNA TOPOISOMERASE 1 (PTHR10290:SF5)                                           | DNA topoisomerase(PC00017)                  | Musculus |
| MOUSE MGI=MGI=1923848 UniProtKB=Q3THK3 | T2FA   | General transcription factor IIF subunit 1;Gtf2f1;ortholog          | GENERAL TRANSCRIPTION FACTOR IIF SUBUNIT 1 (PTHR13011:SF0)                    | general transcription factor(PC00259)       | Musculus |
| MOUSE MGI=MGI=1858303 UniProtKB=Q52K18 | SRRM1  | Serine/arginine repetitive matrix protein 1;Srrm1;ortholog          | SERINE/ARGININE REPETITIVE MATRIX PROTEIN 1 (PTHR23148:SF0)                   | RNA processing factor(PC00147)              | Musculus |
| MOUSE MGI=MGI=1913754 UniProtKB=Q3TLH4 | PRRC2C | Protein PRRC2C;Prrc2c;ortholog                                      | PROTEIN PRRC2C (PTHR14038:SF6)                                                | RNA binding protein(PC00031)                | Musculus |
| MOUSE MGI=MGI=1336214 UniProtKB=Q3U0V1 | FUBP2  | Far upstream element-binding protein 2;Khsrp;ortholog               | FAR UPSTREAM ELEMENT-BINDING PROTEIN 2 (PTHR10288:SF101)                      | RNA binding protein(PC00031)                | Musculus |
| MOUSE MGI=MGI=108177 UniProtKB=O70133  | DHX9   | ATP-dependent RNA helicase A;Dhx9;ortholog                          | ATP-DEPENDENT RNA HELICASE A (PTHR18934:SF119)                                | RNA helicase(PC00032)                       | Musculus |
| MOUSE MGI=MGI=2442040 UniProtKB=P97379 | G3BP2  | Ras GTPase-activating protein-binding protein 2;G3bp2;ortholog      | RAS GTPASE-ACTIVATING PROTEIN-BINDING PROTEIN 2 (PTHR10693:SF10)              | RNA binding protein(PC00031)                | Musculus |
| MOUSE MGI=MGI=2138741 UniProtKB=Q9Z2X1 | HNRPF  | Heterogeneous nuclear ribonucleoprotein F;Hnrfp;ortholog            | HETEROGENEOUS NUCLEAR RIBONUCLEOPROTEIN F (PTHR13976:SF32)                    | RNA splicing factor(PC00148)                | Musculus |
| MOUSE MGI=MGI=99256 UniProtKB=Q8VDJ3   | VIGLN  | Vigilin;Hdlbp;ortholog                                              | VIGILIN (PTHR10627:SF34)                                                      | RNA binding protein(PC00031)                | Musculus |
| MOUSE MGI=MGI=1913305 UniProtKB=P59708 | SF3B6  | Splicing factor 3B subunit 6;Sf3b6;ortholog                         | SPLICING FACTOR 3B SUBUNIT 6 (PTHR12785:SF7)                                  | RNA splicing factor(PC00148)                | Musculus |
| MOUSE MGI=MGI=1861461 UniProtKB=P43276 | H15    | Histone H1.5;Hist1h1b;ortholog                                      | HISTONE H1.5 (PTHR11467:SF24)                                                 | histone(PC00118)                            | Musculus |
| MOUSE MGI=MGI=2442637 UniProtKB=Q569Z6 | TR150  | Thyroid hormone receptor-associated protein 3;Thrap3;ortholog       | THYROID HORMONE RECEPTOR-ASSOCIATED PROTEIN 3 (PTHR15268:SF16)                | nucleic acid binding protein(PC00171)       | Musculus |
| MOUSE MGI=MGI=1917580 UniProtKB=Q8K019 | BCLF1  | Bcl-2-associated transcription factor 1;Bclaf1;ortholog             | BCL-2-ASSOCIATED TRANSCRIPTION FACTOR 1 (PTHR15268:SF4)                       | nucleic acid binding protein(PC00171)       | Musculus |
| MOUSE MGI=MGI=1914715 UniProtKB=Q8K4Z5 | SF3A1  | Splicing factor 3A subunit 1;Sf3a1;ortholog                         | SPLICING FACTOR 3A SUBUNIT 1 (PTHR15316:SF1)                                  | RNA splicing factor(PC00148)                | Musculus |
| MOUSE MGI=MGI=98342 UniProtKB=P27048   | RSMB   | Small nuclear ribonucleoprotein-associated protein B;Snrpb;ortholog | SMALL NUCLEAR RIBONUCLEOPROTEIN-ASSOCIATED PROTEINS B AND B' (PTHR10701:SF15) | RNA splicing factor(PC00148)                | Musculus |
| MOUSE MGI=MGI=1928895 UniProtKB=Q9JL16 | ISG20  | Interferon-stimulated gene 20 kDa protein;Isg20;ortholog            | INTERFERON-STIMULATED GENE 20 KDA PROTEIN (PTHR12801:SF59)                    | exoribonuclease(PC00099)                    | Musculus |
| MOUSE MGI=MGI=98423 UniProtKB=P32067   | LA     | Lupus La protein homolog;Ssb;ortholog                               | LUPUS LA PROTEIN HOMOLOG (PTHR22792:SF140)                                    | RNA binding protein(PC00031)                | Musculus |
| MOUSE MGI=MGI=2179381 UniProtKB=Q99PV0 | PRP8   | Pre-mRNA-processing-splicing factor 8;Prpf8;ortholog                | PRE-MRNA-PROCESSING-SPlicing FACTOR 8 (PTHR11140:SF0)                         | RNA splicing factor(PC00148)                | Musculus |
| MOUSE MGI=MGI=107995 UniProtKB=Q9EPU0  | RENT1  | Regulator of nonsense transcripts 1;Upf1;ortholog                   | REGULATOR OF NONSENSE TRANSCRIPTS 1 (PTHR10887:SF388)                         | RNA helicase(PC00032);DNA helicase(PC00011) | Musculus |
| MOUSE MGI=MGI=98285 UniProtKB=P84104   | SRSF3  | Serine/arginine-rich splicing factor 3;Srsf3;ortholog               | SERINE/ARGININE-RICH SPlicing FACTOR 3 (PTHR23147:SF121)                      | RNA splicing factor(PC00148)                | Musculus |

|                                        |       |                                                                          |                                                                            |                                         |          |
|----------------------------------------|-------|--------------------------------------------------------------------------|----------------------------------------------------------------------------|-----------------------------------------|----------|
| MOUSE MGI=MGI=98086 UniProtKB=P08775   | RPB1  | DNA-directed RNA polymerase II subunit RPB1;Polr2a;ortholog              | DNA-DIRECTED RNA POLYMERASE II SUBUNIT RPB1 (PTHR19376:SF37)               | DNA-directed RNA polymerase(PC00019)    | Musculus |
| MOUSE MGI=MGI=1913618 UniProtKB=Q9D7H3 | RTCA  | RNA 3'-terminal phosphate cyclase;RtcA;ortholog                          | RNA 3'-TERMINAL PHOSPHATE CYCLASE (PTHR11096:SF0)                          | RNA binding protein(PC00031)            | Musculus |
| MOUSE MGI=MGI=1859328 UniProtKB=Q9QXK7 | CPSF3 | Cleavage and polyadenylation specificity factor subunit 3;Cpsf3;ortholog | CLEAVAGE AND POLYADENYLATION SPECIFICITY FACTOR SUBUNIT 3 (PTHR11203:SF11) | RNA processing factor(PC00147)          | Musculus |
| MOUSE MGI=MGI=1933184 UniProtKB=Q6DFW4 | NOP58 | Nucleolar protein 58;Nop58;ortholog                                      | NUCLEOLAR PROTEIN 58 (PTHR10894:SF1)                                       | RNA binding protein(PC00031)            | Musculus |
| MOUSE MGI=MGI=1915433 UniProtKB=Q9D287 | SPF27 | Pre-mRNA-splicing factor SPF27;Bcas2;ortholog                            | PRE-MRNA-SPLICING FACTOR SPF27 (PTHR13296:SF0)                             | RNA splicing factor(PC00148)            | Musculus |
| MOUSE MGI=MGI=1855690 UniProtKB=Q62189 | SNRPA | U1 small nuclear ribonucleoprotein A;Snrpa;ortholog                      | U1 SMALL NUCLEAR RIBONUCLEOPROTEIN A (PTHR10501:SF63)                      | RNA splicing factor(PC00148)            | Musculus |
| MOUSE MGI=MGI=1861727 UniProtKB=Q9ESX5 | DKC1  | H/ACA ribonucleoprotein complex subunit DKC1;Dkc1;ortholog               | H/ACA RIBONUCLEOPROTEIN COMPLEX SUBUNIT DKC1 (PTHR23127:SF0)               | centromere DNA-binding protein(PC00071) | Musculus |
| MOUSE MGI=MGI=1916238 UniProtKB=Q8CCF0 | PRP31 | U4/U6 small nuclear ribonucleoprotein Prp31;Prpf31;ortholog              | U4/U6 SMALL NUCLEAR RIBONUCLEOPROTEIN PRP31 (PTHR13904:SF0)                | RNA splicing factor(PC00148)            | Musculus |
| MOUSE MGI=MGI=104805 UniProtKB=Q9CQI7  | RU2B  | U2 small nuclear ribonucleoprotein B";Snrbp2;ortholog                    | U2 SMALL NUCLEAR RIBONUCLEOPROTEIN B" (PTHR10501:SF61)                     | RNA splicing factor(PC00148)            | Musculus |
| MOUSE MGI=MGI=2140494 UniProtKB=Q8R3G1 | PP1R8 | Nuclear inhibitor of protein phosphatase 1;Ppp1r8;ortholog               | NUCLEAR INHIBITOR OF PROTEIN PHOSPHATASE 1 (PTHR23308:SF28)                | RNA splicing factor(PC00148)            | Musculus |
| MOUSE MGI=MGI=1915525 UniProtKB=Q8VEE4 | RFA1  | Replication protein A 70 kDa DNA-binding subunit;Rpa1;ortholog           | REPLICATION PROTEIN A 70 KDA DNA-BINDING SUBUNIT (PTHR23273:SF4)           | DNA binding protein(PC00009)            | Musculus |
| MOUSE MGI=MGI=1922312 UniProtKB=Q9D554 | SF3A3 | Splicing factor 3A subunit 3;Sf3a3;ortholog                              | SPLICING FACTOR 3A SUBUNIT 3 (PTHR12786:SF2)                               | RNA splicing factor(PC00148)            | Musculus |

Table S3. Highly correlated targets of the miRNAs with higher expression levels in Kupffer cells that are predicted by miRNet.

| Name                                        | Hits | Pval     | adj.Pval     |
|---------------------------------------------|------|----------|--------------|
| Metabolic pathways                          | 785  | 6.87e-20 | 6.87e-18     |
| Pathways in cancer                          | 276  | 9.17e-17 | 4.585e-15    |
| Proteoglycans in cancer                     | 155  | 8.67e-15 | 2.89e-13     |
| Focal adhesion                              | 154  | 2.3e-13  | 5.75e-12     |
| Axon guidance                               | 103  | 7.52e-13 | 1.504e-11    |
| Endocytosis                                 | 192  | 1.42e-11 | 2.36667e-10  |
| PI3K-Akt signaling pathway                  | 234  | 2.35e-11 | 3.357143e-10 |
| Thyroid hormone signaling pathway           | 91   | 2.37e-10 | 2.9625e-9    |
| Insulin resistance                          | 87   | 2.88e-10 | 3.2e-9       |
| T cell receptor signaling pathway           | 83   | 3.41e-10 | 3.41e-9      |
| Rap1 signaling pathway                      | 150  | 4.83e-10 | 4.390909e-9  |
| FoxO signaling pathway                      | 101  | 6.02e-10 | 4.7e-9       |
| Protein processing in endoplasmic reticulum | 122  | 6.11e-10 | 4.7e-9       |
| Chagas disease (American trypanosomiasis)   | 81   | 8.88e-10 | 6.342857e-9  |
| Neurotrophin signaling pathway              | 93   | 1.03e-9  | 6.86667e-9   |
| ErbB signaling pathway                      | 70   | 2.03e-9  | 1.26875e-8   |
| Prostate cancer                             | 71   | 3.15e-9  | 1.852941e-8  |

|                                       |     |            |                |
|---------------------------------------|-----|------------|----------------|
| Osteoclast differentiation            | 94  | 5.98e-9    | 3.322222e-8    |
| MAPK signaling pathway                | 169 | 1.23e-8    | 6.473684e-8    |
| Sphingolipid signaling pathway        | 92  | 1.39e-8    | 6.95e-8        |
| Phosphatidylinositol signaling system | 75  | 1.47e-8    | 7,00E-08       |
| Toxoplasmosis                         | 85  | 1.65e-8    | 7.391304e-8    |
| Adherens junction                     | 60  | 1.7e-8     | 7.391304e-8    |
| TNF signaling pathway                 | 83  | 1.9e-8     | 7.916667e-8    |
| Cell cycle                            | 92  | 2.72e-8    | 1.088e-7       |
| Insulin signaling pathway             | 101 | 5.98e-8    | 2.3e-7         |
| Renal cell carcinoma                  | 55  | 7.99e-8    | 2.910714e-7    |
| TGF-beta signaling pathway            | 66  | 8.15e-8    | 2.910714e-7    |
| HIF-1 signaling pathway               | 81  | 9.11e-8    | 3.141379e-7    |
| Lysosome                              | 90  | 1.16e-7    | 3.866667e-7    |
| Glucagon signaling pathway            | 76  | 1.89e-7    | 6.096774e-7    |
| Pancreatic cancer                     | 53  | 2.17e-7    | 6.78125e-7     |
| Fc gamma R-mediated phagocytosis      | 67  | 2.5e-7     | 7.575758e-7    |
| Inositol phosphate metabolism         | 55  | 4.95e-7    | 0.000001455882 |
| Colorectal cancer                     | 51  | 5.82e-7    | 0.000001662857 |
| mTOR signaling pathway                | 49  | 6.19e-7    | 0.000001719444 |
| Hippo signaling pathway               | 106 | 7.39e-7    | 0.000001960526 |
| HTLV-I infection                      | 179 | 7.45e-7    | 0.000001960526 |
| AMPK signaling pathway                | 91  | 8.29e-7    | 0.000002125641 |
| Long-term potentiation                | 52  | 8.72e-7    | 0.00000218     |
| Small cell lung cancer                | 64  | 9.33e-7    | 0.00000227561  |
| Platelet activation                   | 92  | 9.94e-7    | 0.000002366667 |
| Ubiquitin mediated proteolysis        | 99  | 0.00000113 | 0.000002627907 |
| Tuberculosis                          | 118 | 0.0000015  | 0.0000034      |
| Ras signaling pathway                 | 149 | 0.00000153 | 0.0000034      |
| Chronic myeloid leukemia              | 56  | 0.0000016  | 0.000003478261 |
| Prion diseases                        | 30  | 0.00000227 | 0.000004829787 |
| Endometrial cancer                    | 42  | 0.00000306 | 0.000006375    |
| N-Glycan biosynthesis                 | 40  | 0.00000318 | 0.000006489796 |
| Pertussis                             | 56  | 0.00000342 | 0.00000684     |
| Leishmaniasis                         | 50  | 0.00000507 | 0.00000975     |
| Glioma                                | 50  | 0.00000507 | 0.00000975     |
| Oocyte meiosis                        | 80  | 0.00000528 | 0.000009796296 |
| B cell receptor signaling pathway     | 55  | 0.00000529 | 0.000009796296 |
| Regulation of actin cytoskeleton      | 139 | 0.00000843 | 0.00001532727  |
| Hepatitis B                           | 98  | 0.0000107  | 0.00001910714  |
| Notch signaling pathway               | 39  | 0.0000135  | 0.00002368421  |
| Apoptosis                             | 59  | 0.0000149  | 0.00002568966  |
| Acute myeloid leukemia                | 44  | 0.0000161  | 0.00002728814  |
| Dopaminergic synapse                  | 91  | 0.0000169  | 0.00002816667  |
| Salmonella infection                  | 57  | 0.0000176  | 0.00002885246  |
| GnRH signaling pathway                | 63  | 0.0000192  | 0.00003096774  |
| Non-small cell lung cancer            | 43  | 0.0000254  | 0.00004031746  |
| Epstein-Barr virus infection          | 136 | 0.0000267  | 0.00004171875  |

|                                                          |     |           |               |
|----------------------------------------------------------|-----|-----------|---------------|
| Biosynthesis of amino acids                              | 57  | 0.0000329 | 0.00005061538 |
| Gap junction                                             | 61  | 0.0000411 | 0.00006227273 |
| Wnt signaling pathway                                    | 95  | 0.0000419 | 0.00006253731 |
| ECM-receptor interaction                                 | 62  | 0.0000495 | 0.00007279412 |
| Non-alcoholic fatty liver disease (NAFLD)                | 102 | 0.0000571 | 0.00008275362 |
| Circadian rhythm                                         | 26  | 0.0000755 | 0.0001078571  |
| Choline metabolism in cancer                             | 69  | 0.0000915 | 0.0001288732  |
| cAMP signaling pathway                                   | 124 | 0.000115  | 0.0001597222  |
| Carbon metabolism                                        | 78  | 0.000118  | 0.0001616438  |
| Amphetamine addiction                                    | 49  | 0.000123  | 0.0001662162  |
| Signaling pathways regulating pluripotency of stem cells | 91  | 0.000138  | 0.000184      |
| Leukocyte transendothelial migration                     | 80  | 0.000149  | 0.0001960526  |
| Bladder cancer                                           | 32  | 0.000164  | 0.000212987   |
| Pyrimidine metabolism                                    | 70  | 0.000167  | 0.0002141026  |
| p53 signaling pathway                                    | 48  | 0.000182  | 0.0002275     |
| Fc epsilon RI signaling pathway                          | 48  | 0.000182  | 0.0002275     |
| Primary immunodeficiency                                 | 28  | 0.000199  | 0.000245679   |
| Central carbon metabolism in cancer                      | 47  | 0.000268  | 0.0003228916  |
| cGMP-PKG signaling pathway                               | 108 | 0.000268  | 0.0003228916  |
| Progesterone-mediated oocyte maturation                  | 60  | 0.000282  | 0.0003357143  |
| Steroid biosynthesis                                     | 17  | 0.000309  | 0.0003635294  |
| Dorso-ventral axis formation                             | 21  | 0.000376  | 0.0004372093  |
| PPAR signaling pathway                                   | 56  | 0.000418  | 0.0004804598  |
| Estrogen signaling pathway                               | 65  | 0.000531  | 0.0006011236  |
| Prolactin signaling pathway                              | 51  | 0.000535  | 0.0006011236  |
| Measles                                                  | 87  | 0.000607  | 0.0006744444  |
| Renin secretion                                          | 49  | 0.000652  | 0.0007086957  |
| Bile secretion                                           | 49  | 0.000652  | 0.0007086957  |
| VEGF signaling pathway                                   | 42  | 0.000997  | 0.001062766   |
| Inflammatory mediator regulation of TRP channels         | 80  | 0.000999  | 0.001062766   |
| Influenza A                                              | 105 | 0.00104   | 0.00109375    |
| Phospholipase D signaling pathway                        | 90  | 0.00105   | 0.00109375    |
| Alzheimer's disease                                      | 108 | 0.00122   | 0.001257732   |
| Huntington's disease                                     | 120 | 0.00126   | 0.001285714   |
| Basal transcription factors                              | 32  | 0.00144   | 0.001454545   |
| Cocaine addiction                                        | 35  | 0.00148   | 0.00148       |

Table S4. The list of mRNAs differ more than 2 times in Kupffer cells

| Probe Name | FC KCs vs. MNCs | P value of: KCs vs. MNCs |
|------------|-----------------|--------------------------|
| C8a        | 726,3           | 1E-08                    |
| Hc         | 576,2           | 1E-08                    |
| C9         | 341,6           | 1E-08                    |
| Mbl2       | 174,4           | 1E-08                    |
| Masp1      | 167,1           | 1E-08                    |
| Crp        | 128,8           | 1E-08                    |
| C8b        | 127,8           | 2,01E-06                 |
| Kng1       | 116,0           | 3E-08                    |
| C1s        | 105,3           | 1E-08                    |
| C3         | 46,7            | 1E-08                    |
| C6         | 34,9            | 3,1E-07                  |
| Masp2      | 29,3            | 1,91E-06                 |
| Il1r1      | 24,5            | 1,67E-05                 |
| C2         | 21,3            | 1E-08                    |
| Ifng       | 13,4            | 4,5E-07                  |
| Cxcl9      | 11,6            | 0,000602                 |
| ligp1      | 8,8             | 0,000105                 |
| Il17a      | 8,2             | 4,09E-05                 |
| Arg1       | 7,9             | 1,32E-05                 |
| Flt1       | 7,6             | 2,24E-05                 |
| Ccr3       | 7,3             | 4,15E-06                 |
| Csf2       | 7,1             | 6,3E-07                  |
| Ccl4       | 6,1             | 1,64E-06                 |
| Mafg       | 5,7             | 0,000355                 |
| Jun        | 5,0             | 1,48E-06                 |
| Cxcl10     | 4,9             | 0,000226                 |
| Nos2       | 4,5             | 0,000106                 |
| Ccl3       | 4,1             | 3,3E-07                  |
| Ifit3      | 4,0             | 4,36E-06                 |
| Fos        | 3,9             | 1,33E-06                 |
| Tgfb3      | 3,7             | 9,54E-06                 |
| Tnfsf14    | 3,4             | 1,44E-06                 |
| Ccl5       | 3,2             | 0,002432                 |
| Ifit1      | 2,9             | 0,009291                 |
| Cfb        | 2,9             | 5,15E-05                 |
| Stat2      | 2,8             | 9,72E-06                 |
| Mx2        | 2,7             | 0,000416                 |
| Nfe2l2     | 2,7             | 0,001077                 |
| Oasl1      | 2,6             | 0,027382                 |
| Ccr4       | 2,5             | 0,001074                 |
| Cysltr2    | 2,4             | 0,001512                 |
| Ifi44      | 2,4             | 7,61E-05                 |

|         |        |          |
|---------|--------|----------|
| Tnf     | 2,4    | 0,000141 |
| Csf1    | 2,3    | 0,000601 |
| Ifit2   | 2,3    | 0,000109 |
| Il18rap | 2,3    | 0,000671 |
| Cd163   | 2,2    | 0,011733 |
| Map2k6  | 2,1    | 0,000327 |
| Keap1   | 2,0    | 2E-07    |
| Cd40lg  | 2,0    | 0,00086  |
| C1ra    | 2,0    | 0,004424 |
| Tlr4    | -2,0   | 0,000299 |
| Il1a    | -2,0   | 0,096796 |
| Cd86    | -2,2   | 0,001751 |
| Hmgb2   | -2,2   | 0,000777 |
| Tyrobp  | -2,0   | 2,96E-05 |
| Il12a   | -2,4   | 0,004729 |
| Tlr7    | -2,5   | 0,001239 |
| Ccl2    | -2,6   | 0,109131 |
| Ly96    | -2,7   | 0,008737 |
| Cebpb   | -2,8   | 3,46E-05 |
| C4a     | -3,1   | 0,00048  |
| Itgb2   | -3,3   | 2,5E-07  |
| C1qb    | -3,5   | 0,00037  |
| Ptgs1   | -3,6   | 6E-05    |
| Tlr2    | -3,6   | 1,85E-05 |
| Nlrp3   | -3,7   | 7,46E-05 |
| Tlr8    | -3,8   | 4,84E-05 |
| Cysltr1 | -3,9   | 2,12E-05 |
| Ptgir   | -3,9   | 0,025186 |
| Il6     | -4,0   | 0,000177 |
| C1qa    | -4,5   | 0,000114 |
| Chi3l3  | -4,7   | 0,001325 |
| C3ar1   | -5,3   | 1,27E-06 |
| Ccr1    | -5,8   | 3,06E-05 |
| Alox5   | -5,8   | 1,9E-07  |
| Ccl24   | -6,7   | 6,34E-06 |
| Ccl17   | -7,1   | 0,000958 |
| Alox12  | -9,2   | 5,34E-06 |
| Cxcl1   | -26,4  | 1,01E-05 |
| Cxcl2   | -28,3  | 1,6E-07  |
| Alox15  | -32,2  | 1,1E-07  |
| Tgfb2   | -36,3  | 1E-08    |
| Retnla  | -999,7 | 1E-08    |

Table S5. The list of miRNAs upregulated in Kupffer cells

|    | Probe Name     | FC of : KCs vs<br>MNCs | P value of:<br>KCs vs.<br>MNCs |
|----|----------------|------------------------|--------------------------------|
| 1  | mmu-miR-122    | 211,2                  | 0.00005                        |
| 2  | mmu-let-7d     | 14,65                  | 0.04042                        |
| 3  | mmu-let-7b     | 13,54                  | 0.03417                        |
| 4  | mmu-miR-1944   | 8,27                   | 0.00439                        |
| 5  | mmu-let-7c     | 7,31                   | 0.00699                        |
| 6  | mmu-miR-2141   | 5,62                   | 0.00774                        |
| 7  | mmu-miR-466g   | 5,27                   | 0.00039                        |
| 8  | mmu-miR-1224   | 4,72                   | 0.03371                        |
| 9  | mmu-miR-714    | 3,92                   | 0.01611                        |
| 10 | mmu-miR-376a   | 3,74                   | 0.02910                        |
| 11 | mmu-let-7e     | 3,73                   | 0.00316                        |
| 12 | mmu-miR-539    | 3,25                   | 0.01387                        |
| 13 | mmu-miR-130b   | 3,08                   | 0.02484                        |
| 14 | mmu-miR-16     | 3,06                   | 0.03919                        |
| 15 | mmu-miR-101b   | 3,06                   | 0.01488                        |
| 16 | mmu-miR-30b    | 2,79                   | 0.03154                        |
| 17 | mmu-miR-2146   | 2,78                   | 0.01376                        |
| 18 | mmu-miR-1929   | 2,78                   | 0,02651                        |
| 19 | mmu-miR-200b   | 2,74                   | 0.00212                        |
| 20 | mmu-let-7g     | 2,74                   | 0.01035                        |
| 21 | mmu-miR-1187   | 2,72                   | 0.02944                        |
| 22 | mmu-miR-190    | 2,67                   | 0.01563                        |
| 23 | mmu-miR-202-5p | 2,38                   | 0.01630                        |
| 24 | mmu-miR-720    | 2,31                   | 0.03067                        |
